# Supplementary material
Source: PubMed Central journal article supplement (PMC6105327)
Supplement: DC172285SupplementaryData.pdf [file DC172285SupplementaryData.pdf]

## SUPPLEMENTARY DATA

Supplement to: Tiansheng Wang<sup>1</sup>, Jin-liern Hong<sup>1</sup>, Emily W Gower<sup>1</sup>, Virginia Pate<sup>1</sup>, Seema Garg<sup>2</sup>, John B Buse<sup>3</sup>, Til Stürmer<sup>1</sup>. Incretin-based Therapies and Diabetic Retinopathy: Real World Evidence in Older US Adults.

<sup>1</sup>Department of Epidemiology, University of North Carolina Gillings School of Global Public Health

<sup>2</sup>Department of Ophthalmology, University of North Carolina School of Medicine

<sup>3</sup>Department of Medicine, University of North Carolina School of Medicine

Correspondence to

Til Stürmer, MD, PhD

Department of Epidemiology, UNC Gillings School of Global Public Health, University of North Carolina at Chapel Hill,

135 Dauer Drive, 2101 McGavran-Greenberg Hall, CB #7435

Chapel Hill, NC 27599-7435

Phone: +1 919 966 7433

Fax: +1 919 966 2089

E-mail: [til.sturmer@post.harvard.edu](mailto:til.sturmer@post.harvard.edu)

## SUPPLEMENTARY DATA

### Table of Contents

**Supplementary Table 1.** Codes used for key covariates in this study

**Supplementary Table 2.** Drugs may induce retinopathy

**Supplementary Figure 1.** Overview of study design and new user cohort for as treated analysis

**Supplementary Figure 2.** Overview of study design and new user cohort for initial treatment analysis

**Supplementary Figure 3.** Number of Patients in the base cohort and study cohort

**Supplementary Figure 4.** Propensity score distribution

**Supplementary Table 3.** Patient characteristics of DPP-4 initiators and comparators

**Supplementary Table 4.** Patient characteristics of GLP-1 receptor agonist initiators and comparators

**Supplementary Table 5.** Crude and adjusted hazard ratios for advanced diabetic requiring treatment associated with use of incretin-based therapies compared with therapeutic alternatives based on multiple imputation of clinical measures

**Supplementary Table 6.** Crude and adjusted hazard ratios for advanced diabetic retinopathy requiring treatment associated with use of incretin-based therapies compared with therapeutic alternatives according to Hemoglobin A1c tertiles

**Supplementary Table 7.** Crude and adjusted hazard ratios for advanced diabetic retinopathy requiring treatment associated with use of incretin-based therapies compared with therapeutic alternatives according to presence or not of hypertension and use of angiotension-converting enzyme inhibitors or angiotension receptor blocker at cohort entry

**Supplementary Table 8.** Crude and adjusted hazard ratios for advanced diabetic retinopathy requiring treatment associated with use of individual incretin-based therapy compared with therapeutic alternatives

**Supplementary Table 9.** Crude and adjusted hazard ratios for advanced retinopathy requiring treatment associated with use of incretin-based therapies compared with therapeutic alternatives for various latency period

**Supplementary Table 10.** Crude and adjusted hazard ratios for advanced diabetic retinopathy associated with use of incretin-based therapies compared with therapeutic alternatives based on initial treatment analysis

## SUPPLEMENTARY DATA

**Supplementary Table 11.** Crude and adjusted hazard ratios for advanced diabetic retinopathy treatment associated with use of incretin-based therapies compared with therapeutic alternatives based on modified primary outcome

**Supplementary Table 12.** Crude and adjusted hazard ratios for advanced diabetic retinopathy requiring treatment associated with use of incretin-based therapies compared with therapeutic alternatives after restricting to patients who had an eye exam during follow-up

**Supplementary Table 13.** Crude and adjusted hazard ratios for advanced diabetic retinopathy requiring treatment associated with use of incretin-based therapies compared with therapeutic alternatives after censoring patients receiving long acting insulin during follow-up

**Supplementary Table 14.** Crude and adjusted hazard ratios for advanced diabetic retinopathy requiring treatment associated with use of incretin-based therapies compared with therapeutic alternatives after censoring patients receiving medications that may induce or worsen diabetic retinopathy, or slow the progression of retinopathy (fenofibrate)

**Supplementary Table 15.** Crude and adjusted hazard ratios for advanced diabetic retinopathy associated with use of IBTs compared with therapeutic alternatives based multivariate Cox regression model

**Supplementary Table 16.** Crude and adjusted hazard ratios for diabetic retinopathy associated with use of incretin-based therapy compared with therapeutic alternatives based on secondary outcome

SUPPLEMENTARY DATA

**Supplementary Table 1. Codes used for key covariates in this study.**

| <b>Diabetes</b>                                                 | <b>ICD-9 Codes</b>                     |
|-----------------------------------------------------------------|----------------------------------------|
| Diabetes                                                        | 250                                    |
| <b>Eye disease</b>                                              | <b>ICD-9 Codes</b>                     |
| Diabetic Retinopathy                                            | 362.01-362.07                          |
| Blindness and low vision                                        | 369                                    |
| Age-related macular degeneration                                | 362.50, 362.51, 362.52, 362.42, 362.43 |
| Age-related macular degeneration that needs anti-VEGF treatment | 362.50, 362.52, 362.42, 362.43         |
| Glaucoma                                                        | 365                                    |
| Cataract                                                        | 366                                    |
| Retinal detachments and defects                                 | 361                                    |
| Disorders of globe                                              | 360                                    |
| Chorioretinal inflammation                                      | 363                                    |
| disorder of the iris or ciliary body                            | 364                                    |
| Visual disturbance                                              | 368                                    |
| Keratitis                                                       | 370                                    |
| Corneal disorders                                               | 371                                    |
| Disorders of the conjunctiva                                    | 372                                    |
| Inflammation of eyelid                                          | 373                                    |
| Other disorder of eyelid                                        | 374                                    |
| Disorder of lacrimal system                                     | 375                                    |
| Disorder of orbit                                               | 376                                    |
| Optic nerve disorder                                            | 377                                    |
| Strabismus                                                      | 378                                    |
| Other disorders of eye                                          | 379                                    |
| <b>Procedures for diabetic retinopathy</b>                      | <b>CPT Codes</b>                       |
| Intravitreal Injection                                          | 67028                                  |

## SUPPLEMENTARY DATA

|                                                         |                                          |
|---------------------------------------------------------|------------------------------------------|
| Panretinal Photocoagulation                             | 67228                                    |
| Focal Laser                                             | 67210                                    |
| Vitrectomy                                              | 67036, 67038, 67039, 67040, 67041, 67042 |
| <b>Drugs</b>                                            | <b>HCPCS Codes</b>                       |
| Triamcinolone                                           | J3300, J3301, J3302, J3303               |
| Dexamethasone                                           | J7312, C9256                             |
| Flucinolone                                             | J7313                                    |
| Ranibizumab                                             | J2778                                    |
| Aflibercept                                             | J0178, Q2046, C9291                      |
| Bevacizumab                                             | J9035, C9257, Q2024                      |
| Unclassified/miscellaneous drug codes                   | J3490, J3590, C9399                      |
| <b>Eye Exams/Diagnostic Testing</b>                     | <b>CPT Codes</b>                         |
| Intermediate eye exam, new patient                      | 92002                                    |
| Intermediate eye exam, established patient              | 92012                                    |
| Comprehensive eye exam, new patient                     | 92004                                    |
| Comprehensive eye exam, established patient             | 92014                                    |
| eye exam with anesthesia, complete                      | 92018                                    |
| eye exam w/ anesthesia, limited                         | 92019                                    |
| Gonioscopy                                              | 92020                                    |
| Optical coherence tomography                            | 92134                                    |
| Scanning computerized ophthalmic diagnostic imaging     | 92135                                    |
| Ophthalmoscopy, extended w/ retinal drawing, initial    | 92225                                    |
| Ophthalmoscopy, extended w/ retinal drawing, subsequent | 92226                                    |
| Fundus angioscopy                                       | 92230                                    |
| Fluorescein angiography                                 | 92235                                    |
| Indocyanine-green angiography                           | 92240                                    |
| Fundus photography                                      | 92250                                    |
| Ophthalmoscopy/dynamometry                              | 92260                                    |

## SUPPLEMENTARY DATA

|                                                                     |                                                                                                 |
|---------------------------------------------------------------------|-------------------------------------------------------------------------------------------------|
| B-scan ultrasonography                                              | 76512                                                                                           |
| Consult eye codes*                                                  | 99241-45                                                                                        |
| Evaluation/Management for established patients involving eye exams* | 99213-15                                                                                        |
| Evaluation/Management for new patients involving eye exams*         | 99203-05                                                                                        |
| <b>Health Care Utilization</b>                                      | <b>CPT codes</b>                                                                                |
| HbA1c test                                                          | 83036, 86037, 3044F, 3045F, 3046F                                                               |
| Lipid test                                                          | 80061, 83704, 3048F, 3049F, 3050F                                                               |
| Office/Outpatient visit, new patient                                | 99201, 99202, 99203, 99204, 99205                                                               |
| Office/Outpatient visit, established patient                        | 99211, 99212, 99213, 99214, 99215                                                               |
| Flu shot                                                            | G0008, G9141, G9142, G8108, 90470, 90471, 90660, 90663, 90658,                                  |
| Emergency room visits                                               | 99281, 99282, 99283, 99284, 99295 or PLCSRVC code=23; or revenue center code=0450-0459 or 0981; |
| <b>Health Care Utilization</b>                                      | <b>ICD 9 codes</b>                                                                              |
| Flu shot                                                            | V0481, 9952                                                                                     |

\*We required such codes to be submitted by ophthalmologists or optometrists (physician specialty code 18 or 41).

Reference: Quigley HA, Cassard SD, Gower EW, et al. The **cost of glaucoma care provided to Medicare beneficiaries** from 2002 to 2009. *Ophthalmology*. 2013 Nov;120(11):2249-57. doi: 10.1016/j.ophtha.2013.04.027. Epub 2013 Jun 12.

SUPPLEMENTARY DATA

**Supplementary Table 2. Drugs may induce retinopathy<sup>1,2</sup>.**

| <b>Drug</b>                 | <b>Adverse Event</b>                                                                                   |
|-----------------------------|--------------------------------------------------------------------------------------------------------|
| Tamoxifen                   | retinal vein thrombosis; retinopathy                                                                   |
| Quinine                     | blindness                                                                                              |
| Chloroquine                 | retinopathy; high dose or long-term use                                                                |
| Hydroxychloroquine          | retinal damage with long-term use; retinopathy                                                         |
| Mefloquine                  | visual disturbance                                                                                     |
| Digoxin                     | visual disturbance                                                                                     |
| Ethambutol                  | optic neuritis: decrease acuity; blindness, irreversible                                               |
| Peginterferon Alfa 2a       | serious retinal detachment; vision loss or retinopathy, retinal vein thrombosis                        |
| Peginterferon Alfa 2b       | vision loss or retinopathy, retinal vein thrombosis, retinal detachment                                |
| Interferon Alfa-2b          | retinal hemorrhage                                                                                     |
| Interferon alfa n3          | visual disturbance                                                                                     |
| Interferon alfacon 1        | vision loss or retinopathy                                                                             |
| Interferon Beta 1a          | retinal vascular disorder: ie, retinopathy, cotton wool spots or obstruction of retinal artery or vein |
| Interferon Alfa 1b          | retinal hemorrhage                                                                                     |
| Isocarboxazid               | visual disturbance                                                                                     |
| Sildenafil                  | retinal hemorrhage, vision loss                                                                        |
| Isotretinoin                | visual disturbance                                                                                     |
| Vigabatrin                  | visual field defect                                                                                    |
| Fingolimod                  | macular edema                                                                                          |
| Docetaxel                   | macular edema                                                                                          |
| Niacin                      | macular edema                                                                                          |
| Latanoprost<br>(Ophthalmic) | macular edema                                                                                          |

**Reference**

1. Nencini C, Barberi L Fau, Micheli L, et al. Retinopathy induced by drugs and herbal medicines. *Eur Rev Med Pharmacol Sci* 2008; 12: 293-298
2. Makri OE, Georgalas I Fau, Georgakopoulos CD. Drug-induced macular edema. *Drugs* (2013) 73:789–802

## SUPPLEMENTARY DATA

**Supplementary Figure 1. Overview of study design and new user cohort for as treated analysis.** Rx, prescription. Treatment discontinuation was defined as no refill within a period equal to the prescribed duration of the last filled prescription (Stopping) plus a grace period of 90 days for incretin-based therapies and their comparators, respectively. Switching is defined as discontinuing the current treatment and started filling the comparator drug. Augmenting is defined as a subsequent addition of a comparator drug. The eligible study population consisted of Medicare enrollees who were at least 65 years old and had at least 12 months of continuous enrolment in Medicare parts A, B and D before initiation. New users were defined as the first dispensing of a prescription in a given drug class after a washout period of 12 months for this drug class.

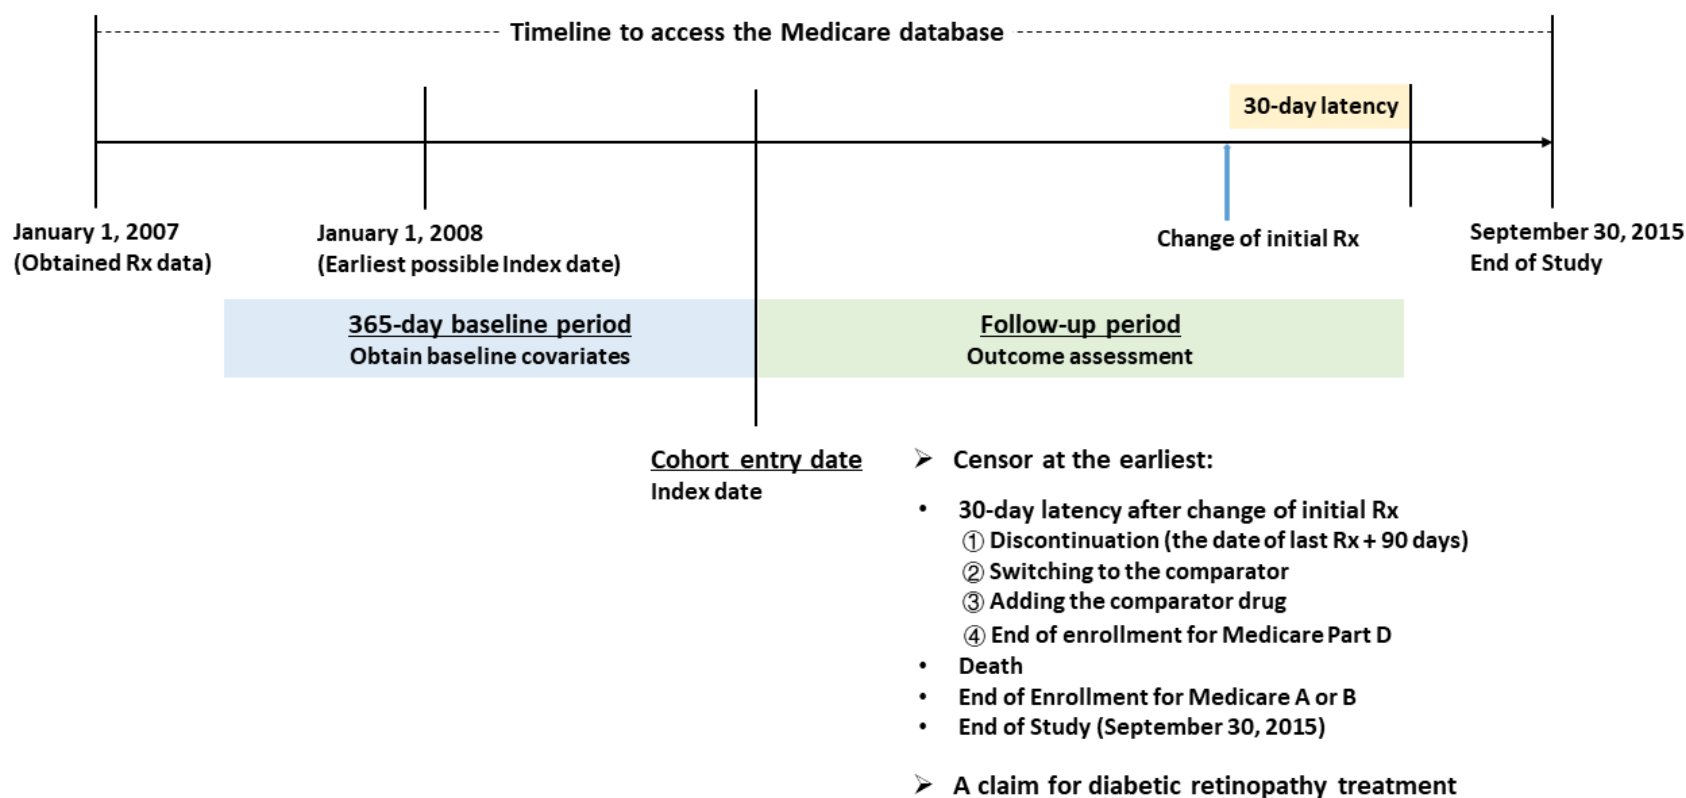



## SUPPLEMENTARY DATA

**Supplementary Figure 2. Overview of study design and new user cohort for initial treatment analysis.** Rx, prescription. The eligible study population consisted of Medicare enrollees who were at least 65 years old and had at least 12 months of continuous enrolment in Medicare parts A, B and D before initiation. New users were defined as the first dispensing of a prescription in a given drug class after a washout period of 12 months for this drug class.

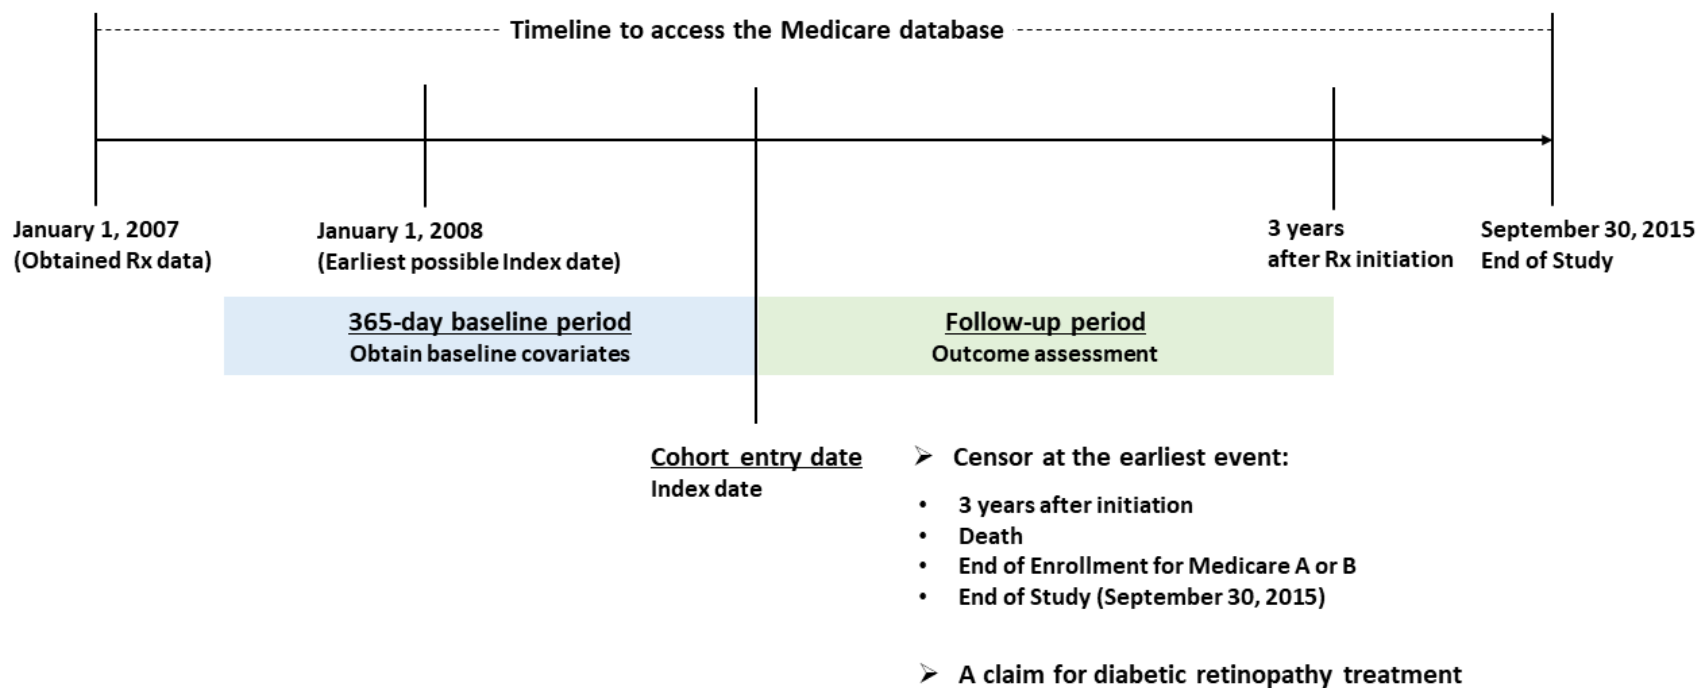

## SUPPLEMENTARY DATA

**Supplementary Figure 3. Number of Patients in the base cohort and study cohort.** DPP4i, DPP-4 inhibitor; SU, Sulfonylurea; TZD, Thiazolidinedione; GLP1RA, GLP-1 receptor agonist; LAI, long acting insulin. Initiation defined as having no prescriptions of either drug class during the 12 months prior to initiation. A patient could be a new user of incretin-based therapies or comparator in different periods according to the 12-month washout period definition, thus could be selected in both incretin-based therapies and comparator cohorts in different periods.

# SUPPLEMENTARY DATA

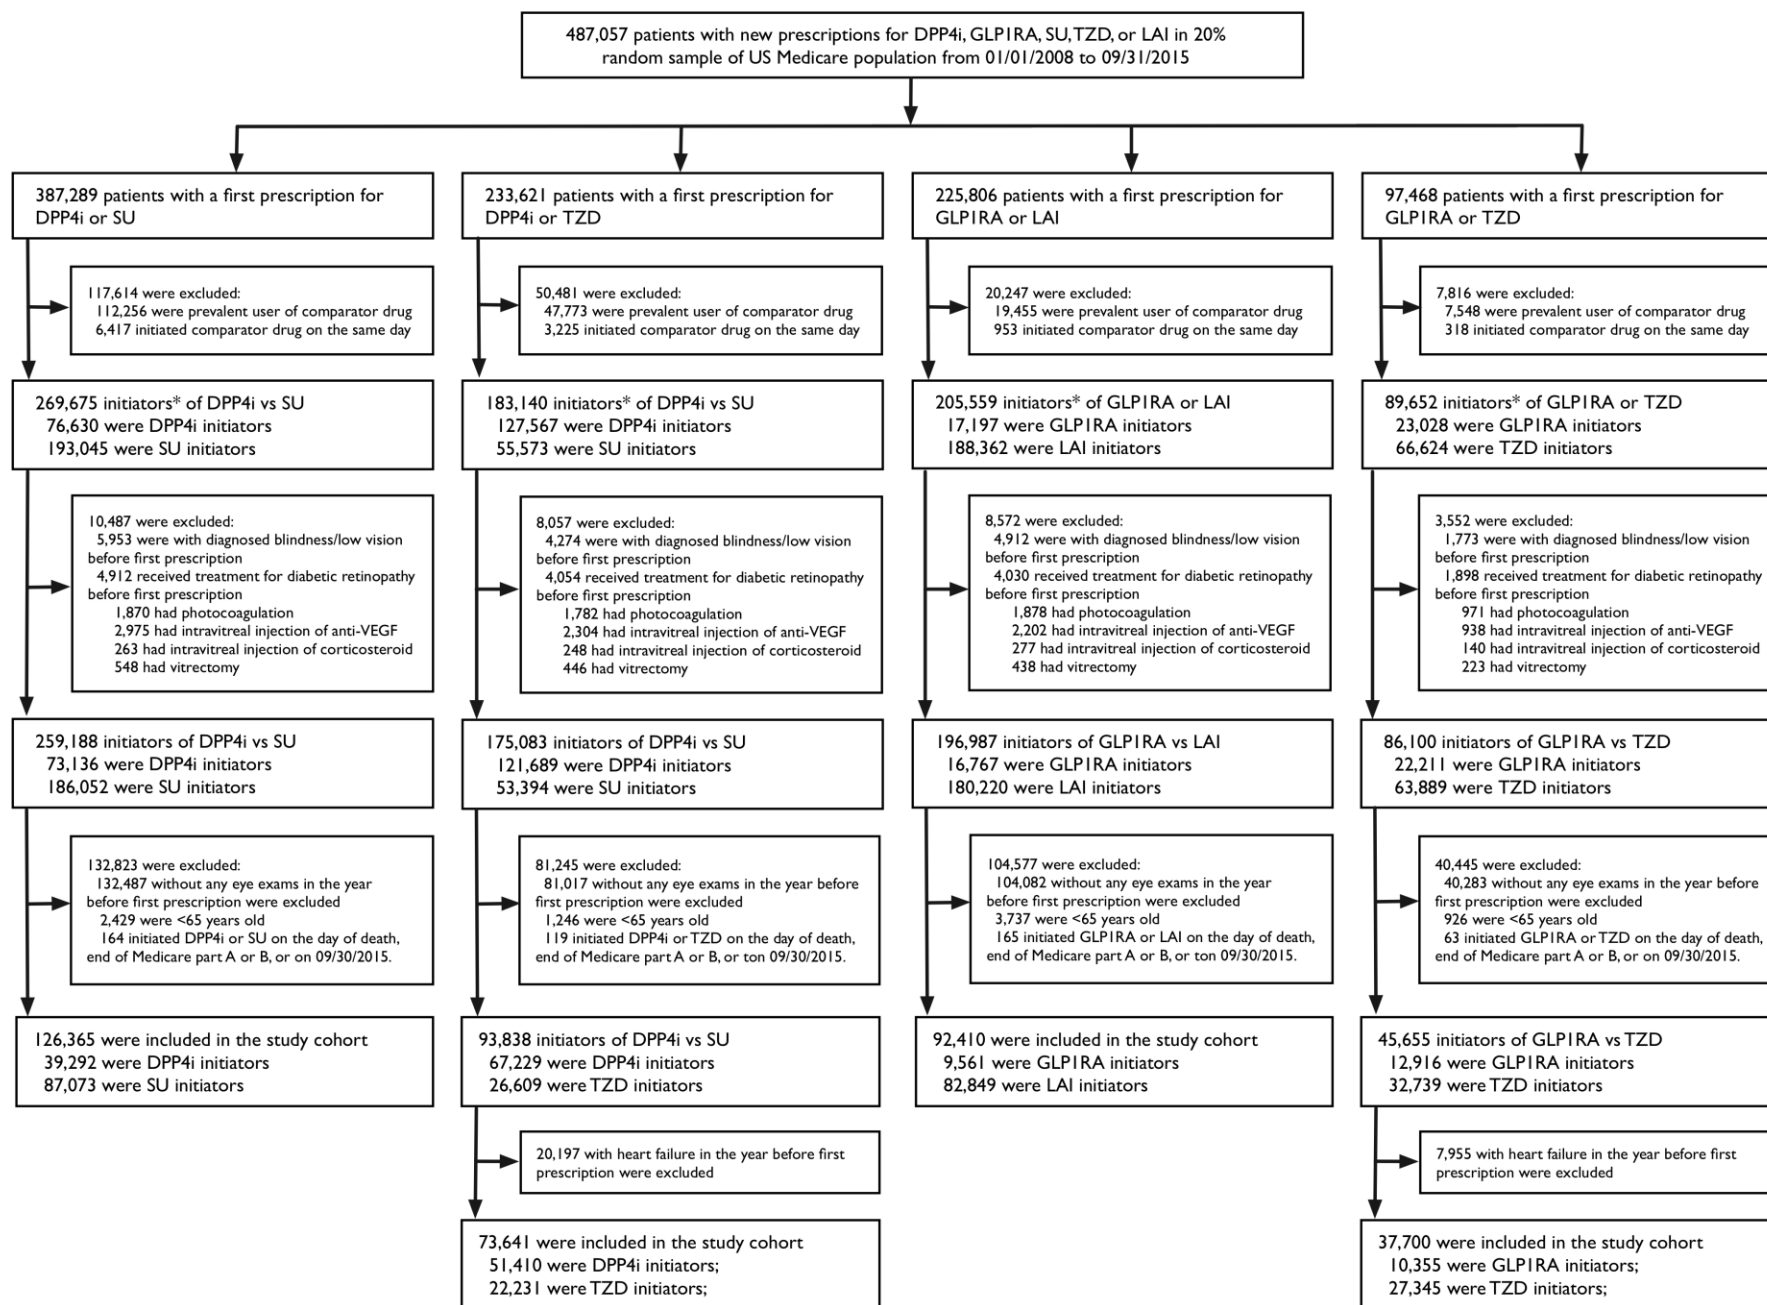

## SUPPLEMENTARY DATA

**Supplementary Figure 4. Propensity score distribution.** DPP4i vs SU cohort (panel A); DPP4i vs TZD cohort (panel B); GLP1RA vs LAI cohort (panel C); GLP1RA vs TZD cohort (panel D). Abbreviations: DPP4i, DPP-4 inhibitor; SU, Sulfonylurea; TZD, Thiazolidinedione; GLP, GLP-1 receptor agonist; LAI, long acting insulin. The “double peak” shape of plot for the propensity score distribution of TZD in DPP4i vs TZD comparison is mainly due to the calendar year dummy variables, i.e. a function of the increased use of DPP4i and decreased use of TZD overtime.

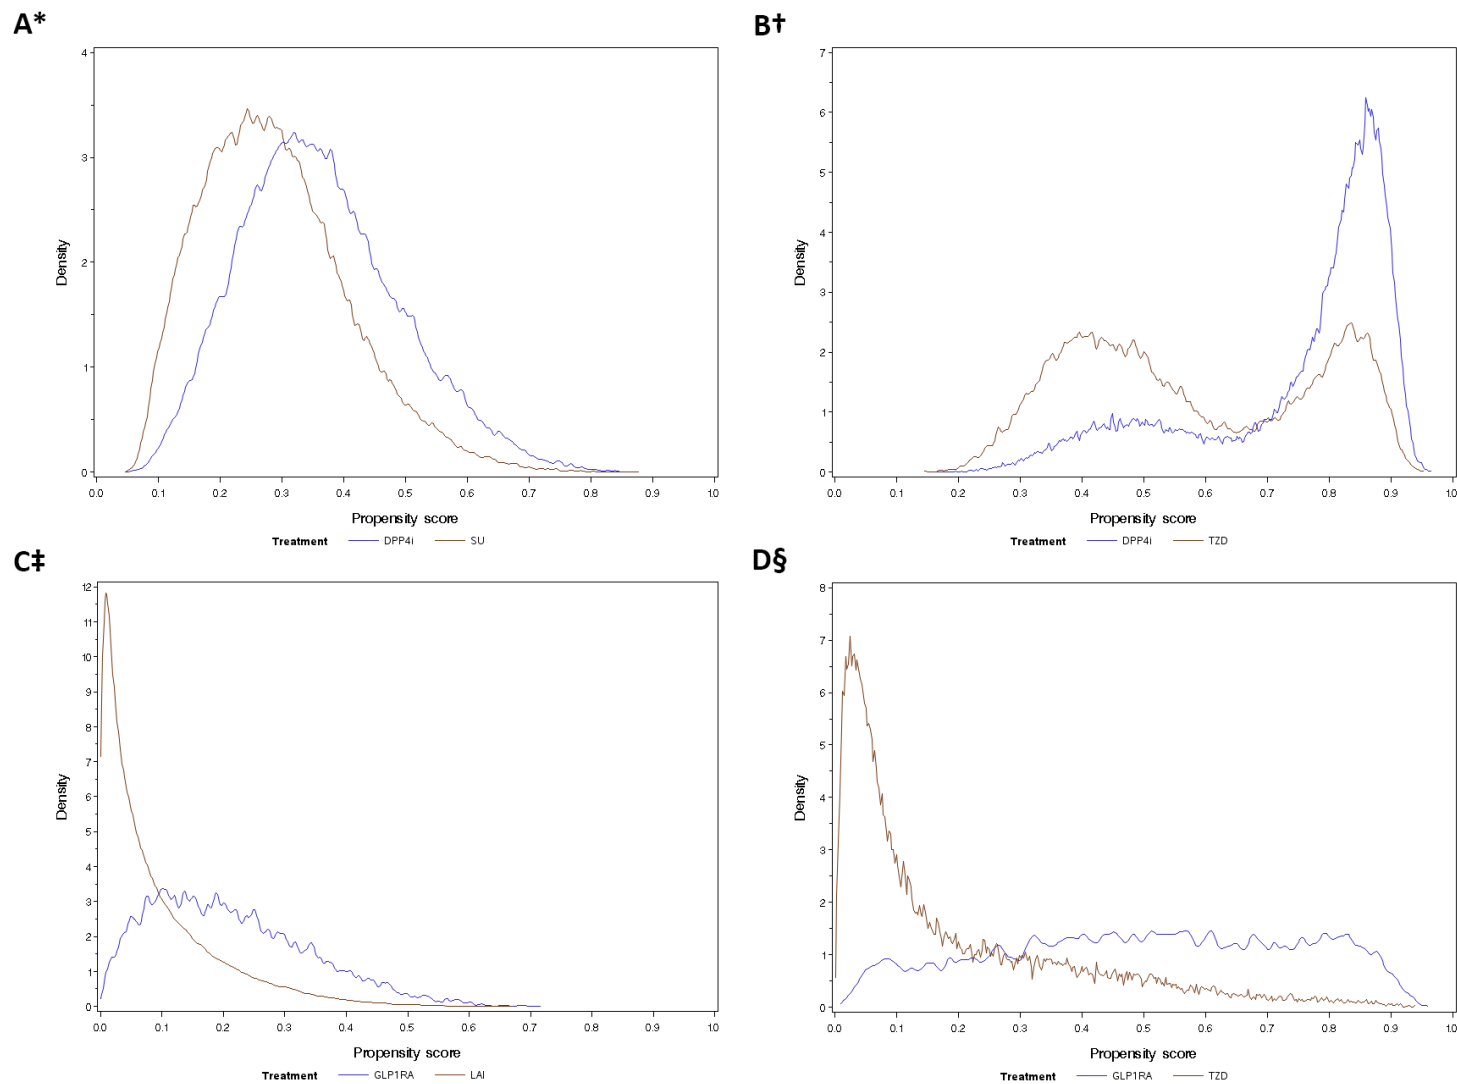

SUPPLEMENTARY DATA

**Supplementary Table 3. Patient characteristics of DPP-4 initiators and comparators\*.**

| Characteristic                                        | DPP4i vs SU          |                   |                                          |                              |                                        | DPP4i vs TZD         |                   |                                          |                               |                                        |
|-------------------------------------------------------|----------------------|-------------------|------------------------------------------|------------------------------|----------------------------------------|----------------------|-------------------|------------------------------------------|-------------------------------|----------------------------------------|
|                                                       | DPP4i<br>(N†=39,292) | SU<br>(N=87,073)  | Unweighted<br>Standardized<br>Difference | Weighted<br>SU<br>(N=39,482) | Weighted<br>Standardized<br>Difference | DPP4i<br>(N†=51,410) | TZD<br>(N=22,231) | Unweighted<br>Standardized<br>Difference | Weighted<br>TZD<br>(N=51,450) | Weighted<br>Standardized<br>Difference |
| <b>Age, mean<br/>(SD)</b>                             | 76.5(7.01)           | 76.7(7.19)        | 0.034                                    | 76.4(6.99)                   | 0.006                                  | 76.0(6.73)           | 75.4(6.51)        | 0.086                                    | 76.0(6.75)                    | 0.000                                  |
| <b>Male, n (%)</b>                                    | 15,461<br>(39.3%)    | 35,631<br>(40.9%) | 0.032                                    | 15,504<br>(39.3%)            | 0.002                                  | 20,307 (39.5%)       | 9,262<br>(41.7%)  | 0.044                                    | 20,642<br>(40.1%)             | 0.013                                  |
| <b>Race, n (%)</b>                                    |                      |                   |                                          |                              |                                        |                      |                   |                                          |                               |                                        |
| White                                                 | 30,064<br>(76.5%)    | 69,824<br>(80.2%) | 0.089                                    | 30,268<br>(76.7%)            | 0.004                                  | 39,951 (77.7%)       | 16,708<br>(75.2%) | 0.060                                    | 40,663<br>(79.0%)             | 0.032                                  |
| Black                                                 | 4,081<br>(10.4%)     | 9,300<br>(10.7%)  | 0.010                                    | 4,066<br>(10.3%)             | 0.003                                  | 5,112 (9.9%)         | 2,301<br>(10.4%)  | 0.013                                    | 4,698<br>(9.1%)               | 0.028                                  |
| Others                                                | 5,147<br>(13.1%)     | 7,949<br>(9.1%)   | 0.127                                    | 5,148<br>(13.0%)             | 0.002                                  | 6,347 (12.3%)        | 3,222<br>(14.5%)  | 0.063                                    | 6,089<br>(11.8%)              | 0.016                                  |
| <b>Calendar<br/>year of<br/>initiating, n<br/>(%)</b> |                      |                   |                                          |                              |                                        |                      |                   |                                          |                               |                                        |
| 2008                                                  | 2,280<br>(5.8%)      | 9,077<br>(10.4%)  | 0.170                                    | 2,287<br>(5.8%)              | 0.000                                  | 2,557 (5.0%)         | 4,004<br>(18.0%)  | 0.418                                    | 2,561<br>(5.0%)               | 0.000                                  |
| 2009                                                  | 3,065<br>(7.8%)      | 12,520<br>(14.4%) | 0.211                                    | 3,057<br>(7.7%)              | 0.002                                  | 3,840 (7.5%)         | 5,200<br>(23.4%)  | 0.452                                    | 3,836<br>(7.5%)               | 0.000                                  |
| 2010                                                  | 3,993<br>(10.2%)     | 11,933<br>(13.7%) | 0.109                                    | 4,008<br>(10.2%)             | 0.000                                  | 4,925 (9.6%)         | 4,306<br>(19.4%)  | 0.281                                    | 4,921<br>(9.6%)               | 0.001                                  |
| 2011                                                  | 6,039<br>(15.4%)     | 11,487<br>(13.2%) | 0.062                                    | 6,072<br>(15.4%)             | 0.000                                  | 6,926 (13.5%)        | 2,454<br>(11.0%)  | 0.074                                    | 6,959<br>(13.5%)              | 0.002                                  |
| 2012                                                  | 6,316<br>(16.1%)     | 10,774<br>(12.4%) | 0.106                                    | 6,370<br>(16.1%)             | 0.002                                  | 7,888 (15.3%)        | 1,272<br>(5.7%)   | 0.317                                    | 7,843<br>(15.2%)              | 0.003                                  |
| 2013                                                  | 5,605<br>(14.3%)     | 10,989<br>(12.6%) | 0.048                                    | 5,623<br>(14.2%)             | 0.001                                  | 8,162 (15.9%)        | 1,556<br>(7.0%)   | 0.282                                    | 8,115<br>(15.8%)              | 0.003                                  |
| 2014                                                  | 6,417<br>(16.3%)     | 11,221<br>(12.9%) | 0.098                                    | 6,464<br>(16.4%)             | 0.001                                  | 9,243 (18.0%)        | 1,776<br>(8.0%)   | 0.301                                    | 9,307<br>(18.1%)              | 0.003                                  |

SUPPLEMENTARY DATA

|                                            |                   |                   |       |                   |       |                |                   |       |                   |       |
|--------------------------------------------|-------------------|-------------------|-------|-------------------|-------|----------------|-------------------|-------|-------------------|-------|
| 2015                                       | 5,577<br>(14.2%)  | 9,072<br>(10.4%)  | 0.115 | 5,601<br>(14.2%)  | 0.000 | 7,869 (15.3%)  | 1,663<br>(7.5%)   | 0.248 | 7,909<br>(15.4%)  | 0.002 |
| <b>Eye comorbidities, n (%)</b>            |                   |                   |       |                   |       |                |                   |       |                   |       |
| Retinopathy                                | 4,555<br>(11.6%)  | 8,156<br>(9.4%)   | 0.073 | 4,594<br>(11.6%)  | 0.001 | 6,094 (11.9%)  | 2,711<br>(12.2%)  | 0.010 | 6,120<br>(11.9%)  | 0.001 |
| Age-related macular degeneration           | 5,173<br>(13.2%)  | 11,650<br>(13.4%) | 0.006 | 5,177<br>(13.1%)  | 0.002 | 6,243 (12.1%)  | 2,479<br>(11.2%)  | 0.031 | 6,135<br>(11.9%)  | 0.007 |
| Retinal detachment and defects             | 562 (1.4%)        | 1,271<br>(1.5%)   | 0.002 | 558 (1.4%)        | 0.001 | 708 (1.4%)     | 327 (1.5%)        | 0.008 | 710 (1.4%)        | 0.000 |
| Other retinal disorders                    | 6,671<br>(17.0%)  | 13,434<br>(15.4%) | 0.042 | 6,656<br>(16.9%)  | 0.003 | 8,229 (16.0%)  | 3,275<br>(14.7%)  | 0.035 | 8,497<br>(16.5%)  | 0.014 |
| Cataract                                   | 20,852<br>(53.1%) | 47,001<br>(54.0%) | 0.018 | 20,884<br>(52.9%) | 0.003 | 27,721 (53.9%) | 12,281<br>(55.2%) | 0.027 | 27,812<br>(54.1%) | 0.003 |
| Glaucoma                                   | 11,470<br>(29.2%) | 23,446<br>(26.9%) | 0.050 | 11,454<br>(29.0%) | 0.004 | 14,646 (28.5%) | 6,031<br>(27.1%)  | 0.030 | 14,467<br>(28.1%) | 0.008 |
| Other eye diseases§                        | 20,202<br>(51.4%) | 42,616<br>(48.9%) | 0.049 | 20,201<br>(51.2%) | 0.005 | 25,172 (49.0%) | 10,144<br>(45.6%) | 0.067 | 25,078<br>(48.7%) | 0.004 |
| <b>Diabetes comorbidities, n (%)</b>       |                   |                   |       |                   |       |                |                   |       |                   |       |
| Nephropathy                                | 4,152<br>(10.6%)  | 6,981<br>(8.0%)   | 0.088 | 4,231<br>(10.7%)  | 0.005 | 4,920 (9.6%)   | 1,784<br>(8.0%)   | 0.055 | 4,997<br>(9.7%)   | 0.005 |
| Neuropathy                                 | 9,359<br>(23.8%)  | 16,053<br>(18.4%) | 0.132 | 9,497<br>(24.1%)  | 0.006 | 11,646 (22.7%) | 4,334<br>(19.5%)  | 0.077 | 11,775<br>(22.9%) | 0.006 |
| <b>Cardiovascular comorbidities, n (%)</b> |                   |                   |       |                   |       |                |                   |       |                   |       |
| Hypertension                               | 36,239<br>(92.2%) | 79,172<br>(90.9%) | 0.047 | 36,430<br>(92.3%) | 0.002 | 47,316 (92.0%) | 19,959<br>(89.8%) | 0.079 | 47,251<br>(91.8%) | 0.007 |
| Dyslipidemia                               | 34,813<br>(88.6%) | 72,664<br>(83.5%) | 0.149 | 35,048<br>(88.8%) | 0.005 | 45,699 (88.9%) | 19,107<br>(85.9%) | 0.089 | 45,930<br>(89.3%) | 0.012 |
| Coronary                                   | 17,011            | 35,638            | 0.048 | 17,106            | 0.001 | 17,843 (34.7%) | 6,881             | 0.080 | 17,777            | 0.003 |

SUPPLEMENTARY DATA

|                       |            |          |       |            |       |                |            |       |          |       |
|-----------------------|------------|----------|-------|------------|-------|----------------|------------|-------|----------|-------|
| artery disease        | (43.3%)    | (40.9%)  |       | (43.3%)    |       |                | (31.0%)    |       | (34.6%)  |       |
| Cerebrovascul         | 9,814      | 20,423   | 0.036 | 9,854      | 0.000 | 10,517 (20.5%) | 4,066      | 0.055 | 10,256   | 0.013 |
| ar disease            | (25.0%)    | (23.5%)  |       | (25.0%)    |       |                | (18.3%)    |       | (19.9%)  |       |
| Peripheral            | 9,258      | 17,991   | 0.070 | 9,259      | 0.003 | 9,722 (18.9%)  | 3,644      | 0.066 | 9,535    | 0.010 |
| vascular              | (23.6%)    | (20.7%)  |       | (23.5%)    |       |                | (16.4%)    |       | (18.5%)  |       |
| disease               |            |          |       |            |       |                |            |       |          |       |
| Congestive            | 9,067      | 20,131   | 0.001 | 9,127      | 0.001 | NA             | NA         | NA    | NA       | NA    |
| Heart Failure         | (23.1%)    | (23.1%)  |       | (23.1%)    |       |                |            |       |          |       |
| <b>Other</b>          |            |          |       |            |       |                |            |       |          |       |
| <b>comorbidities,</b> |            |          |       |            |       |                |            |       |          |       |
| <b>n (%)</b>          |            |          |       |            |       |                |            |       |          |       |
| Chronic               | 8,264      | 19,171   | 0.024 | 8,271      | 0.002 | 7,186 (14.0%)  | 2,903      | 0.027 | 7,053    | 0.008 |
| obstructive           | (21.0%)    | (22.0%)  |       | (20.9%)    |       |                | (13.1%)    |       | (13.7%)  |       |
| pulmonary             |            |          |       |            |       |                |            |       |          |       |
| disease               |            |          |       |            |       |                |            |       |          |       |
| Depression            | 7,223      | 14,971   | 0.031 | 7,274      | 0.001 | 7,511 (14.6%)  | 2,839      | 0.054 | 7,429    | 0.005 |
|                       | (18.4%)    | (17.2%)  |       | (18.4%)    |       |                | (12.8%)    |       | (14.4%)  |       |
| Cancer                | 7,918      | 17,489   | 0.002 | 7,908      | 0.003 | 9,608 (18.7%)  | 3,660      | 0.058 | 9,723    | 0.005 |
|                       | (20.2%)    | (20.1%)  |       | (20.0%)    |       |                | (16.5%)    |       | (18.9%)  |       |
| Chronic               | 11,913     | 24,822   | 0.040 | 11,994     | 0.001 | 12,879 (25.1%) | 4,640      | 0.100 | 12,949   | 0.003 |
| kidney                | (30.3%)    | (28.5%)  |       | (30.4%)    |       |                | (20.9%)    |       | (25.2%)  |       |
| disease¶              |            |          |       |            |       |                |            |       |          |       |
| <b>Co-</b>            |            |          |       |            |       |                |            |       |          |       |
| <b>medications,</b>   |            |          |       |            |       |                |            |       |          |       |
| <b>n (%)</b>          |            |          |       |            |       |                |            |       |          |       |
| Metformin             | 25,399     | 49,479   | 0.161 | 25,782     | 0.014 | 37,162 (72.3%) | 14,924     | 0.112 | 37,247   | 0.002 |
|                       | (64.6%)    | (56.8%)  |       | (65.3%)    |       |                | (67.1%)    |       | (72.4%)  |       |
| SU                    | NA         | 87,073   | NA    | NA         | NA    | 26,736 (52.0%) | 12,047     | 0.044 | 27,086   | 0.013 |
|                       |            | (100.0%) |       |            |       |                | (54.2%)    |       | (52.6%)  |       |
| TZD                   | 7,384      | 10,736   | 0.179 | 7,586      | 0.011 | NA             | 22,231     | NA    | 51,450   | NA    |
|                       | (18.8%)    | (12.3%)  |       | (19.2%)    |       |                | (100.0%)   |       | (100.0%) |       |
| DPP4i                 | 39,292     | NA       | NA    | NA         | NA    | 51,410         | NA         | NA    | NA       | NA    |
|                       | (100.0%)   |          |       |            |       | (100.0%)       |            |       |          |       |
| GLP1RA                | 943 (2.4%) | 1,480    | 0.049 | 991 (2.5%) | 0.007 | 1,219 (2.4%)   | 623 (2.8%) | 0.027 | 1,249    | 0.004 |
|                       |            | (1.7%)   |       |            |       |                |            |       | (2.4%)   |       |
| LAI                   | 8,363      | 12,108   | 0.195 | 8,612      | 0.013 | 8,187 (15.9%)  | 3,355      | 0.023 | 8,282    | 0.005 |
|                       | (21.3%)    | (13.9%)  |       | (21.8%)    |       |                | (15.1%)    |       | (16.1%)  |       |

SUPPLEMENTARY DATA

|                                                     |                |                |       |                |       |                |                |       |                |       |
|-----------------------------------------------------|----------------|----------------|-------|----------------|-------|----------------|----------------|-------|----------------|-------|
| Alpha glucodase inhibitor                           | 225 (0.6%)     | 295 (0.3%)     | 0.035 | 234 (0.6%)     | 0.003 | 423 (0.8%)     | 170 (0.8%)     | 0.007 | 426 (0.8%)     | 0.001 |
| Meglitinide                                         | 1,819 (4.6%)   | 2,207 (2.5%)   | 0.113 | 1,906 (4.8%)   | 0.009 | 1,548 (3.0%)   | 577 (2.6%)     | 0.025 | 1,681 (3.3%)   | 0.015 |
| ACE inhibitors                                      | 17,133 (43.6%) | 40,642 (46.7%) | 0.062 | 17,242 (43.7%) | 0.001 | 24,076 (46.8%) | 11,020 (49.6%) | 0.055 | 23,940 (46.5%) | 0.006 |
| ARBs                                                | 13,857 (35.3%) | 23,190 (26.6%) | 0.188 | 13,996 (35.4%) | 0.004 | 17,281 (33.6%) | 6,293 (28.3%)  | 0.115 | 17,227 (33.5%) | 0.003 |
| Beta-blockers                                       | 21,930 (55.8%) | 48,452 (55.6%) | 0.003 | 21,992 (55.7%) | 0.002 | 26,899 (52.3%) | 10,351 (46.6%) | 0.115 | 26,867 (52.2%) | 0.002 |
| CCBs                                                | 15,060 (38.3%) | 32,393 (37.2%) | 0.023 | 15,101 (38.2%) | 0.002 | 19,400 (37.7%) | 7,758 (34.9%)  | 0.059 | 19,149 (37.2%) | 0.011 |
| Statins                                             | 28,536 (72.6%) | 56,987 (65.4%) | 0.156 | 28,741 (72.8%) | 0.004 | 37,329 (72.6%) | 15,120 (68.0%) | 0.101 | 37,390 (72.7%) | 0.001 |
| Loop diuretics                                      | 10,891 (27.7%) | 25,207 (28.9%) | 0.027 | 10,939 (27.7%) | 0.000 | 8,865 (17.2%)  | 3,290 (14.8%)  | 0.067 | 9,099 (17.7%)  | 0.012 |
| Other diuretics                                     | 15,861 (40.4%) | 34,387 (39.5%) | 0.018 | 15,971 (40.5%) | 0.002 | 20,844 (40.5%) | 8,764 (39.4%)  | 0.023 | 20,802 (40.4%) | 0.002 |
| Fenofibrate                                         | 3,312 (8.4%)   | 5,641 (6.5%)   | 0.074 | 3,388 (8.6%)   | 0.005 | 4,498 (8.7%)   | 1,675 (7.5%)   | 0.044 | 4,585 (8.9%)   | 0.006 |
| Any drugs may induce retinopathy or macular edema** | 7,983 (20.3%)  | 17,846 (20.5%) | 0.004 | 8,030 (20.3%)  | 0.001 | 8,762 (17.0%)  | 3,600 (16.2%)  | 0.023 | 9,090 (17.7%)  | 0.016 |
| <b>Health care utilizations, n (%)</b>              |                |                |       |                |       |                |                |       |                |       |
| <b>No. of hyperglycemia diagnosis</b>               |                |                |       |                |       |                |                |       |                |       |
| 0                                                   | 20,302 (51.7%) | 51,432 (59.1%) | 0.149 | 20,248 (51.3%) | 0.008 | 25,128 (48.9%) | 11,653 (52.4%) | 0.071 | 25,234 (49.0%) | 0.003 |
| 1                                                   | 5,249 (13.4%)  | 11,714 (13.5%) | 0.003 | 5,271 (13.4%)  | 0.000 | 7,029 (13.7%)  | 2,902 (13.1%)  | 0.018 | 7,035 (13.7%)  | 0.000 |
| 2                                                   | 3,106          | 6,149          | 0.032 | 3,133          | 0.001 | 4,231 (8.2%)   | 1,711          | 0.020 | 4,157          | 0.006 |



SUPPLEMENTARY DATA

|                                                |                   |                   |       |                   |       |                |                   |        |                   |       |
|------------------------------------------------|-------------------|-------------------|-------|-------------------|-------|----------------|-------------------|--------|-------------------|-------|
|                                                | (7.9%)            | (7.1%)            |       | (7.9%)            |       | (7.7%)         |                   | (8.1%) |                   |       |
| ≥3                                             | 10,635<br>(27.1%) | 17,778<br>(20.4%) | 0.157 | 10,830<br>(27.4%) | 0.008 | 15,022 (29.2%) | 5,965<br>(26.8%)  | 0.053  | 15,025<br>(29.2%) | 0.000 |
| <b>No. of hospitalizations due to diabetes</b> |                   |                   |       |                   |       |                |                   |        |                   |       |
| 0                                              | 38,627<br>(98.3%) | 85,759<br>(98.5%) | 0.015 | 38,810<br>(98.3%) | 0.001 | 50,730 (98.7%) | 21,991<br>(98.9%) | 0.022  | 50,850<br>(98.8%) | 0.014 |
| 1                                              | 592 (1.5%)        | 1,177<br>(1.4%)   | 0.013 | 595 (1.5%)        | 0.000 | 613 (1.2%)     | 221 (1.0%)        | 0.019  | 530 (1.0%)        | 0.015 |
| ≥2                                             | 73 (0.2%)         | 137 (0.2%)        | 0.007 | 77 (0.2%)         | 0.002 | 67 (0.1%)      | 19 (0.1%)         | 0.014  | 71 (0.1%)         | 0.002 |
| <b>No. of ED visit due to diabetes</b>         |                   |                   |       |                   |       |                |                   |        |                   |       |
| 0                                              | 37,929<br>(96.5%) | 84,164<br>(96.7%) | 0.007 | 38,104<br>(96.5%) | 0.001 | 49,715 (96.7%) | 21,506<br>(96.7%) | 0.002  | 49,804<br>(96.8%) | 0.006 |
| 1                                              | 1,072<br>(2.7%)   | 2,417<br>(2.8%)   | 0.003 | 1,084<br>(2.7%)   | 0.001 | 1,388 (2.7%)   | 610 (2.7%)        | 0.003  | 1,351<br>(2.6%)   | 0.005 |
| ≥2                                             | 291 (0.7%)        | 492 (0.6%)        | 0.022 | 293 (0.7%)        | 0.000 | 307 (0.6%)     | 115 (0.5%)        | 0.011  | 295 (0.6%)        | 0.003 |
| <b>Physician encounters</b>                    |                   |                   |       |                   |       |                |                   |        |                   |       |
| 0                                              | 863 (2.2%)        | 2,813<br>(3.2%)   | 0.064 | 853 (2.2%)        | 0.002 | 935 (1.8%)     | 553 (2.5%)        | 0.046  | 853 (1.7%)        | 0.012 |
| 1-3                                            | 3,105<br>(7.9%)   | 9,546<br>(11.0%)  | 0.105 | 3,083<br>(7.8%)   | 0.003 | 4,088 (8.0%)   | 2,381<br>(10.7%)  | 0.095  | 4,030<br>(7.8%)   | 0.004 |
| 4-6                                            | 6,103<br>(15.5%)  | 15,914<br>(18.3%) | 0.073 | 6,124<br>(15.5%)  | 0.001 | 9,183 (17.9%)  | 4,614<br>(20.8%)  | 0.073  | 9,197<br>(17.9%)  | 0.000 |
| ≥7                                             | 29,221<br>(74.4%) | 58,800<br>(67.5%) | 0.151 | 29,421<br>(74.5%) | 0.003 | 37,204 (72.4%) | 14,683<br>(66.0%) | 0.137  | 37,370<br>(72.6%) | 0.006 |
| <b>ED visit (any reason)</b>                   |                   |                   |       |                   |       |                |                   |        |                   |       |
| 0                                              | 23,382<br>(59.5%) | 49,093<br>(56.4%) | 0.063 | 23,475<br>(59.5%) | 0.001 | 34,385 (66.9%) | 15,311<br>(68.9%) | 0.043  | 34,616<br>(67.3%) | 0.008 |
| 1                                              | 7,396<br>(18.8%)  | 17,173<br>(19.7%) | 0.023 | 7,454<br>(18.9%)  | 0.001 | 9,376 (18.2%)  | 3,908<br>(17.6%)  | 0.017  | 9,308<br>(18.1%)  | 0.004 |

SUPPLEMENTARY DATA

|                               |                   |                   |       |                   |       |                |                   |       |                   |       |
|-------------------------------|-------------------|-------------------|-------|-------------------|-------|----------------|-------------------|-------|-------------------|-------|
| $\geq 2$                      | 8,514<br>(21.7%)  | 20,807<br>(23.9%) | 0.053 | 8,553<br>(21.7%)  | 0.000 | 7,649 (14.9%)  | 3,012<br>(13.5%)  | 0.038 | 7,526<br>(14.6%)  | 0.007 |
| <b>Flu vaccine</b>            | 24,181<br>(61.5%) | 51,775<br>(59.5%) | 0.043 | 24,306<br>(61.6%) | 0.000 | 31,935 (62.1%) | 12,989<br>(58.4%) | 0.075 | 32,402<br>(63.0%) | 0.018 |
| <b>Low income<br/>subsidy</b> | 16,130<br>(41.1%) | 31,169<br>(35.8%) | 0.108 | 16,117<br>(40.8%) | 0.005 | 18,562 (36.1%) | 8,598<br>(38.7%)  | 0.053 | 17,360<br>(33.7%) | 0.050 |
| <b>Lab results#</b>           |                   |                   |       |                   |       |                |                   |       |                   |       |
| <b>HbA1c††</b>                |                   |                   |       |                   |       |                |                   |       |                   |       |
| <7%<br>(53mmol/mol)           | 17,155(43.6<br>%) | 38,589(44.<br>3%) | 0.019 | 17,175(43.<br>5%) | 0.003 | 17,024(33.1%)  | 7,863(35.4<br>%)  | 0.048 | 16,976(33.<br>0%) | 0.004 |
| 7-9% (53-75<br>mmol/mol)      | 15,078(38.4<br>%) | 32,919(37.<br>8%) | 0.019 | 15,186(38.<br>5%) | 0.002 | 24,629(47.9%)  | 10,080(45.<br>3%) | 0.052 | 24,811(48.<br>2%) | 0.007 |
| >9%<br>(75mmol/mol)           | 7,059(18.0%<br>)  | 15,565(17.<br>9%) | 0.012 | 7,124(18.1<br>%)  | 0.002 | 9,758(19.0%)   | 4,288(19.3<br>%)  | 0.022 | 9,691(18.8<br>%)  | 0.006 |
| <b>SBP††</b>                  |                   |                   |       |                   |       |                |                   |       |                   |       |
| <130 mmHg                     | 15,654(39.8<br>%) | 31,962(36.<br>7%) | 0.065 | 15,730(39.<br>8%) | 0.001 | 20,011(38.9%)  | 7,332(33.0<br>%)  | 0.124 | 20,238(39.<br>3%) | 0.009 |
| 130-139<br>mmHg               | 11,065(28.2<br>%) | 25,159(28.<br>9%) | 0.020 | 11,124(28.<br>2%) | 0.001 | 14,289(27.8%)  | 6,746(30.3<br>%)  | 0.058 | 14,258(27.<br>7%) | 0.005 |
| $\geq 140$ mmHg               | 12,573(32.0<br>%) | 29,952(34.<br>4%) | 0.057 | 12,631(32.<br>0%) | 0.001 | 17,110(33.3%)  | 8,153(36.7<br>%)  | 0.073 | 16,981(33.<br>0%) | 0.006 |
| <b>DBP††</b>                  |                   |                   |       |                   |       |                |                   |       |                   |       |
| <80 mmHg                      | 24,971(63.5<br>%) | 55,020(63.<br>2%) | 0.021 | 25,100(63.<br>6%) | 0.001 | 31,118(60.5%)  | 13,521(60.<br>8%) | 0.027 | 31,251(60.<br>7%) | 0.005 |
| 80-89 mmHg                    | 11,312(28.8<br>%) | 26,097(30.<br>0%) | 0.031 | 11,366(28.<br>8%) | 0.001 | 15,912(30.9%)  | 6,752(30.4<br>%)  | 0.025 | 15,914(30.<br>9%) | 0.004 |
| $\geq 90$ mmHg                | 3,010(7.7%)       | 5,956(6.8%)       | 0.036 | 3,019(7.7%<br>)   | 0.002 | 4,381(8.5%)    | 1,958(8.8%<br>)   | 0.026 | 4,312(8.4%<br>)   | 0.007 |
| <b>LDL-C††</b>                |                   |                   |       |                   |       |                |                   |       |                   |       |
| <100 mg/dl                    | 29,116(74.1<br>%) | 63,202(72.<br>6%) | 0.036 | 29,262(74.<br>1%) | 0.001 | 37,028(72.0%)  | 15,740(70.<br>8%) | 0.028 | 37,216(72.<br>3%) | 0.007 |
| 100-129 mg/dl                 | 6,539(16.6%<br>)  | 14,478(16.<br>6%) | 0.020 | 6,575(16.7<br>%)  | 0.001 | 8,842(17.2%)   | 4,000(18.0<br>%)  | 0.028 | 8,824(17.1<br>%)  | 0.006 |
| $\geq 130$ mg/dl              | 3,638(9.3%)       | 9,394(10.8<br>%)  | 0.051 | 3,648(9.2%<br>)   | 0.001 | 5,540(10.8%)   | 2,491(11.2<br>%)  | 0.030 | 5,437(10.6<br>%)  | 0.007 |

## SUPPLEMENTARY DATA

Abbreviations: No, number; DPP4i, dipeptidyl peptidase-4 inhibitors; SU, Sulfonylurea; TZD, Thiazolidinedione; GLP1RA, Glucagon-like peptide-1 receptor agonist; LAI, long acting insulin; ACE inhibitors, Angiotension-converting enzyme inhibitors; ARB, angiotension receptor blockers; CCBs, calcium-channel blockers; ED, emergency department; NA, not applicable. HbA1c, hemoglobin A1c; SBP, systolic blood pressure; DBP, diastolic blood pressure; LDL-C, low-density lipoprotein cholesterol; NTSR: numbers too small (<11) to report based on Center for Medicare and Medicaid Services (CMS) rules and data use agreement.

\*The comparisons were defined by use of IBT and PS-weighted comparator. Covariates were measured in 12 months before cohort entry including the index date (New users appear to 100% have the treatment at baseline). Initiation defined as having no prescriptions of either drug class during the 12 months prior to initiation.

† The size of the population for a specific drug differed across cohorts because of the requirement not to have been treated prior to index date with the comparator drug class (Figure S1).

‡ Weighted by standardizing to their distribution in incretin-based therapy initiators by using weights of one for incretin-based therapy initiators and the odds of the estimated propensity score for comparator initiators.

§ Other eye disease included disorders of globe (ICD-9-CM 360), chorioretinal inflammation (ICD-9-CM 363), disorder of the iris or ciliary body (ICD-9-CM 364), visual disturbance (ICD-9-CM 368), keratitis (ICD-9-CM 370), corneal disorders (ICD-9-CM 371), disorders of the conjunctiva (ICD-9-CM 372), inflammation of eyelid (ICD-9-CM 373), other disorder of eyelid (ICD-9-CM 374), disorder of lacrimal system (ICD-9-CM 375), disorder of orbit (ICD-9-CM 376), optic nerve disorder (ICD-9-CM 377), strabismus (ICD-9-CM 378), and other disorders of eye (ICD-9-CM 379).

|| Patients with congestive baseline heart failure were excluded for GLP1RA vs TZD and DPP4i vs TZD comparison; and patients are required not to have been treated prior to index date with the comparator drug class.

¶ Diabetic nephropathy codes (250.40-250.43) were not included to identify chronic kidney disease (ICD-9-CM codes: 016.0; 095.4; 189.0; 189.9; 223.0; 236.91; 271.4; 274.1; 283.11; 403; 404; 440.1; 442.1; 572.4; 581-588; 591; 753.12-753.19; 753.2; 794.4).

\*\* Drugs may induce diabetic retinopathy or macular edema included tamoxifen, quinine, chloroquine, hydroxychloroquine, mefloquine, digoxin, ethambutol, peginterferonalfa 2a, peginterferonalfa 2b, interferon alfa-2b, interferon alfa n3, interferon alfacon 1, interferon beta 1a, interferon alfa 1b, isocarboxazid, sildenafil, isotretinoin, vigabatrin, fingolimod, doxetaxel, niacin, and latanoprost (ophthalmic).

#Based on the measure closest to index date.

†† For clinical measures, the distribution of covariates and standardized difference were the mean of results from multiple imputation (20 iterations) as each iteration produces different number of patients with each level of clinical measure, e.g. HbA1c <7% (53mmol/mol), 7-9% (53-75mmol/mol), >9% (75mmol/mol). Availability and distribution of clinical measures were shown in Table 1.

SUPPLEMENTARY DATA

Supplementary Table 4. Patient characteristics of GLP-1 receptor agonist initiators and comparators\*.

| Characteristic                              | GLP1RA vs LAI        |                   |                                          |                              |                                        | GLP1RA vs TZD         |                   |                                          |                               |                                         |
|---------------------------------------------|----------------------|-------------------|------------------------------------------|------------------------------|----------------------------------------|-----------------------|-------------------|------------------------------------------|-------------------------------|-----------------------------------------|
|                                             | GLP1RA<br>(N†=9,561) | LAI<br>(N=82,849) | Unweighted<br>Standardized<br>Difference | Weighted<br>LAI<br>(N=9,595) | Weighted<br>Standardized<br>Difference | GLP1RA<br>(N†=10,355) | TZD<br>(N=27,345) | Unweighted<br>Standardized<br>Difference | Weighted<br>TZD<br>(N=10,768) | Weighted<br>Standardize<br>d Difference |
| Age, mean<br>(SD)                           | 73.0(5.17)           | 76.9(7.49)        | 0.609                                    | 73.0(5.18)                   | 0.003                                  | 72.7(5.01)            | 75.5(6.51)        | 0.480                                    | 72.5(5.01)                    | 0.035                                   |
| Male, n (%)                                 | 3,970<br>(41.5%)     | 35,069<br>(42.3%) | 0.016                                    | 3,986<br>(41.5%)             | 0.000                                  | 4,018 (38.8%)         | 11,424<br>(41.8%) | 0.061                                    | 4,242<br>(39.4%)              | 0.012                                   |
| Race, n (%)                                 |                      |                   |                                          |                              |                                        |                       |                   |                                          |                               |                                         |
| White                                       | 8,279<br>(86.6%)     | 64,568<br>(77.9%) | 0.228                                    | 8,304<br>(86.5%)             | 0.001                                  | 8,809 (85.1%)         | 20,234<br>(74.0%) | 0.277                                    | 9,294<br>(86.3%)              | 0.035                                   |
| Black                                       | 599 (6.3%)           | 10,434<br>(12.6%) | 0.218                                    | 606 (6.3%)                   | 0.002                                  | 795 (7.7%)            | 2,819<br>(10.3%)  | 0.092                                    | 747 (6.9%)                    | 0.028                                   |
| Others                                      | 683 (7.1%)           | 7,847<br>(9.5%)   | 0.084                                    | 685 (7.1%)                   | 0.000                                  | 751 (7.3%)            | 4,292<br>(15.7%)  | 0.267                                    | 727 (6.7%)                    | 0.020                                   |
| Calendar<br>year of<br>initiating, n<br>(%) |                      |                   |                                          |                              |                                        |                       |                   |                                          |                               |                                         |
| 2008                                        | 527 (5.5%)           | 7,583<br>(9.2%)   | 0.140                                    | 524 (5.5%)                   | 0.002                                  | 288 (2.8%)            | 4,280<br>(15.7%)  | 0.456                                    | 285 (2.6%)                    | 0.008                                   |
| 2009                                        | 590 (6.2%)           | 10,474<br>(12.6%) | 0.223                                    | 587 (6.1%)                   | 0.002                                  | 433 (4.2%)            | 5,860<br>(21.4%)  | 0.534                                    | 429 (4.0%)                    | 0.010                                   |
| 2010                                        | 775 (8.1%)           | 10,400<br>(12.6%) | 0.147                                    | 773 (8.1%)                   | 0.002                                  | 557 (5.4%)            | 5,094<br>(18.6%)  | 0.416                                    | 551 (5.1%)                    | 0.012                                   |
| 2011                                        | 1,108<br>(11.6%)     | 10,762<br>(13.0%) | 0.043                                    | 1,100<br>(11.5%)             | 0.004                                  | 923 (8.9%)            | 3,113<br>(11.4%)  | 0.082                                    | 914 (8.5%)                    | 0.015                                   |
| 2012                                        | 1,361<br>(14.2%)     | 11,361<br>(13.7%) | 0.015                                    | 1,364<br>(14.2%)             | 0.001                                  | 1,410 (13.6%)         | 1,691<br>(6.2%)   | 0.251                                    | 1,383<br>(12.8%)              | 0.023                                   |
| 2013                                        | 1,674<br>(17.5%)     | 11,471<br>(13.8%) | 0.101                                    | 1,701<br>(17.7%)             | 0.006                                  | 1,984 (19.2%)         | 2,164<br>(7.9%)   | 0.333                                    | 2,105<br>(19.6%)              | 0.010                                   |
| 2014                                        | 1,713<br>(17.9%)     | 11,373<br>(13.7%) | 0.115                                    | 1,719<br>(17.9%)             | 0.000                                  | 2,296 (22.2%)         | 2,686<br>(9.8%)   | 0.342                                    | 2,451<br>(22.8%)              | 0.014                                   |
| 2015                                        | 1,813                | 9,425             | 0.213                                    | 1,827                        | 0.002                                  | 2,464 (23.8%)         | 2,457             | 0.408                                    | 2,650                         | 0.019                                   |

SUPPLEMENTARY DATA

|                                            |               |                |       |               |       |               |                |         |                |       |
|--------------------------------------------|---------------|----------------|-------|---------------|-------|---------------|----------------|---------|----------------|-------|
|                                            | (19.0%)       | (11.4%)        |       | (19.0%)       |       | (9.0%)        |                | (24.6%) |                |       |
| <b>Eye comorbidities, n (%)</b>            |               |                |       |               |       |               |                |         |                |       |
| Retinopathy                                | 1,025 (10.7%) | 11,734 (14.2%) | 0.104 | 1,032 (10.8%) | 0.001 | 1,382 (13.3%) | 3,447 (12.6%)  | 0.022   | 1,402 (13.0%)  | 0.010 |
| Age-related macular degeneration           | 885 (9.3%)    | 10,975 (13.2%) | 0.127 | 886 (9.2%)    | 0.001 | 951 (9.2%)    | 3,074 (11.2%)  | 0.068   | 935 (8.7%)     | 0.018 |
| Retinal detachment and defects             | 153 (1.6%)    | 1,168 (1.4%)   | 0.016 | 151 (1.6%)    | 0.002 | 176 (1.7%)    | 399 (1.5%)     | 0.019   | 178 (1.7%)     | 0.003 |
| Other retinal disorders                    | 1,561 (16.3%) | 13,871 (16.7%) | 0.011 | 1,568 (16.3%) | 0.000 | 1,702 (16.4%) | 4,098 (15.0%)  | 0.040   | 1,796 (16.7%)  | 0.007 |
| Cataract                                   | 5,439 (56.9%) | 42,068 (50.8%) | 0.123 | 5,457 (56.9%) | 0.000 | 5,817 (56.2%) | 14,983 (54.8%) | 0.028   | 6,095 (56.6%)  | 0.009 |
| Glaucoma                                   | 2,374 (24.8%) | 22,038 (26.6%) | 0.041 | 2,402 (25.0%) | 0.005 | 2,554 (24.7%) | 7,619 (27.9%)  | 0.073   | 2,662 (24.7%)  | 0.001 |
| Other eye diseases§                        | 4,514 (47.2%) | 39,448 (47.6%) | 0.008 | 4,536 (47.3%) | 0.001 | 4,863 (47.0%) | 12,722 (46.5%) | 0.009   | 5,067 (47.1%)  | 0.002 |
| <b>Diabetes comorbidities, n (%)</b>       |               |                |       |               |       |               |                |         |                |       |
| Nephropathy                                | 1,031 (10.8%) | 13,331 (16.1%) | 0.156 | 1,030 (10.7%) | 0.001 | 1,332 (12.9%) | 2,382 (8.7%)   | 0.134   | 1,367 (12.7%)  | 0.005 |
| Neuropathy                                 | 2,497 (26.1%) | 23,903 (28.9%) | 0.061 | 2,515 (26.2%) | 0.002 | 3,106 (30.0%) | 5,622 (20.6%)  | 0.218   | 3,332 (30.9%)  | 0.021 |
| <b>Cardiovascular comorbidities, n (%)</b> |               |                |       |               |       |               |                |         |                |       |
| Hypertension                               | 8,797 (92.0%) | 77,018 (93.0%) | 0.036 | 8,833 (92.1%) | 0.002 | 9,589 (92.6%) | 24,663 (90.2%) | 0.086   | 10,018 (93.0%) | 0.017 |
| Dyslipidemia                               | 8,742 (91.4%) | 69,448 (83.8%) | 0.233 | 8,785 (91.6%) | 0.005 | 9,436 (91.1%) | 23,736 (86.8%) | 0.138   | 9,852 (91.5%)  | 0.013 |
| Coronary artery disease                    | 3,560 (37.2%) | 41,977 (50.7%) | 0.273 | 3,569 (37.2%) | 0.001 | 3,596 (34.7%) | 8,592 (31.4%)  | 0.070   | 3,681 (34.2%)  | 0.011 |

SUPPLEMENTARY DATA

|                                       |                   |                    |       |                  |       |                    |                    |       |                  |       |
|---------------------------------------|-------------------|--------------------|-------|------------------|-------|--------------------|--------------------|-------|------------------|-------|
| Cerebrovascular disease               | 1,629<br>(17.0%)  | 25,924<br>(31.3%)  | 0.338 | 1,622<br>(16.9%) | 0.003 | 1,728 (16.7%)      | 4,991<br>(18.3%)   | 0.041 | 1,811<br>(16.8%) | 0.004 |
| Peripheral vascular disease           | 1,632<br>(17.1%)  | 23,533<br>(28.4%)  | 0.273 | 1,633<br>(17.0%) | 0.001 | 1,689 (16.3%)      | 4,630<br>(16.9%)   | 0.017 | 1,732<br>(16.1%) | 0.006 |
| Congestive Heart Failure              | 1,501<br>(15.7%)  | 28,941<br>(34.9%)  | 0.454 | 1,494<br>(15.6%) | 0.003 | NA                 | NA                 | NA    | NA               | NA    |
| <b>Other comorbidities, n (%)</b>     |                   |                    |       |                  |       |                    |                    |       |                  |       |
| Chronic obstructive pulmonary disease | 1,543<br>(16.1%)  | 23,423<br>(28.3%)  | 0.295 | 1,550<br>(16.2%) | 0.000 | 1,408 (13.6%)      | 3,539<br>(12.9%)   | 0.019 | 1,464<br>(13.6%) | 0.000 |
| Depression                            | 1,570<br>(16.4%)  | 19,073<br>(23.0%)  | 0.166 | 1,568<br>(16.3%) | 0.002 | 1,838 (17.7%)      | 3,443<br>(12.6%)   | 0.144 | 1,944<br>(18.1%) | 0.008 |
| Cancer                                | 1,636<br>(17.1%)  | 18,537<br>(22.4%)  | 0.133 | 1,632<br>(17.0%) | 0.003 | 1,767 (17.1%)      | 4,544<br>(16.6%)   | 0.012 | 1,814<br>(16.8%) | 0.006 |
| Chronic kidney disease¶               | 2,327<br>(24.3%)  | 36,390<br>(43.9%)  | 0.422 | 2,340<br>(24.4%) | 0.001 | 2,593 (25.0%)      | 6,032<br>(22.1%)   | 0.070 | 2,709<br>(25.2%) | 0.003 |
| <b>Co-medications, n (%)</b>          |                   |                    |       |                  |       |                    |                    |       |                  |       |
| Metformin                             | 6,969<br>(72.9%)  | 44,333<br>(53.5%)  | 0.410 | 7,016<br>(73.1%) | 0.005 | 7,038 (68.0%)      | 18,736<br>(68.5%)  | 0.012 | 7,303<br>(67.8%) | 0.003 |
| SU                                    | 5,695<br>(59.6%)  | 49,977<br>(60.3%)  | 0.015 | 5,831<br>(60.8%) | 0.025 | 5,036 (48.6%)      | 15,461<br>(56.5%)  | 0.159 | 5,195<br>(48.2%) | 0.008 |
| TZD                                   | 2,180<br>(22.8%)  | 14,537<br>(17.5%)  | 0.131 | 2,237<br>(23.3%) | 0.012 | NA                 | 27,345<br>(100.0%) | NA    | NA               | NA    |
| DPP4i                                 | 3,594<br>(37.6%)  | 20,581<br>(24.8%)  | 0.278 | 3,716<br>(38.7%) | 0.024 | 3,301 (31.9%)      | 5,532<br>(20.2%)   | 0.268 | 3,660<br>(34.0%) | 0.045 |
| GLP1RA                                | 9,561<br>(100.0%) | NA                 | NA    | NA               | NA    | 10,355<br>(100.0%) | NA                 | NA    | NA               | NA    |
| LAI                                   | NA                | 82,849<br>(100.0%) | NA    | NA               | NA    | 4,229 (40.8%)      | 4,006<br>(14.6%)   | 0.612 | 4,657<br>(43.2%) | 0.049 |
| Alpha                                 | 148 (1.5%)        | 979 (1.2%)         | 0.032 | 154 (1.6%)       | 0.005 | 132 (1.3%)         | 269 (1.0%)         | 0.028 | 188 (1.7%)       | 0.039 |

SUPPLEMENTARY DATA

|                                                     |               |                |       |               |       |               |                |       |               |       |
|-----------------------------------------------------|---------------|----------------|-------|---------------|-------|---------------|----------------|-------|---------------|-------|
| glucodase inhibitor                                 |               |                |       |               |       |               |                |       |               |       |
| Meglitinide                                         | 374 (3.9%)    | 3,846 (4.6%)   | 0.036 | 393 (4.1%)    | 0.009 | 326 (3.1%)    | 869 (3.2%)     | 0.002 | 333 (3.1%)    | 0.003 |
| ACE inhibitors                                      | 4,401 (46.0%) | 40,539 (48.9%) | 0.058 | 4,419 (46.1%) | 0.001 | 4,849 (46.8%) | 13,504 (49.4%) | 0.051 | 4,996 (46.4%) | 0.009 |
| ARBs                                                | 3,532 (36.9%) | 22,644 (27.3%) | 0.207 | 3,576 (37.3%) | 0.007 | 3,838 (37.1%) | 8,196 (30.0%)  | 0.151 | 4,070 (37.8%) | 0.015 |
| Beta-blockers                                       | 5,002 (52.3%) | 49,548 (59.8%) | 0.151 | 5,032 (52.4%) | 0.003 | 5,325 (51.4%) | 12,904 (47.2%) | 0.085 | 5,596 (52.0%) | 0.011 |
| CCBs                                                | 3,289 (34.4%) | 33,556 (40.5%) | 0.126 | 3,318 (34.6%) | 0.004 | 3,634 (35.1%) | 9,706 (35.5%)  | 0.008 | 3,724 (34.6%) | 0.011 |
| Statins                                             | 7,230 (75.6%) | 56,132 (67.8%) | 0.175 | 7,254 (75.6%) | 0.000 | 7,882 (76.1%) | 19,024 (69.6%) | 0.148 | 8,134 (75.5%) | 0.013 |
| Loop diuretics                                      | 2,403 (25.1%) | 33,119 (40.0%) | 0.321 | 2,415 (25.2%) | 0.001 | 2,164 (20.9%) | 3,979 (14.6%)  | 0.167 | 2,350 (21.8%) | 0.023 |
| Other diuretics                                     | 4,172 (43.6%) | 30,603 (36.9%) | 0.137 | 4,201 (43.8%) | 0.003 | 4,414 (42.6%) | 10,821 (39.6%) | 0.062 | 4,643 (43.1%) | 0.010 |
| Fenofibrate                                         | 1,035 (10.8%) | 5,797 (7.0%)   | 0.135 | 1,062 (11.1%) | 0.008 | 1,138 (11.0%) | 2,170 (7.9%)   | 0.104 | 1,195 (11.1%) | 0.003 |
| Any drugs may induce retinopathy or macular edema** | 1,741 (18.2%) | 18,794 (22.7%) | 0.111 | 1,758 (18.3%) | 0.003 | 1,685 (16.3%) | 4,448 (16.3%)  | 0.000 | 1,866 (17.3%) | 0.028 |
| <b>Health care utilizations, n (%)</b>              |               |                |       |               |       |               |                |       |               |       |
| <b>No. of hyperglycemia diagnosis</b>               |               |                |       |               |       |               |                |       |               |       |
| 0                                                   | 4,270 (44.7%) | 31,322 (37.8%) | 0.140 | 4,258 (44.4%) | 0.006 | 3,947 (38.1%) | 13,788 (50.4%) | 0.250 | 3,958 (36.8%) | 0.028 |
| 1                                                   | 1,312 (13.7%) | 12,410 (15.0%) | 0.036 | 1,311 (13.7%) | 0.002 | 1,283 (12.4%) | 3,548 (13.0%)  | 0.018 | 1,330 (12.4%) | 0.001 |
| 2                                                   | 833 (8.7%)    | 7,993 (9.6%)   | 0.032 | 843 (8.8%)    | 0.003 | 898 (8.7%)    | 2,163 (7.9%)   | 0.028 | 889 (8.3%)    | 0.015 |

SUPPLEMENTARY DATA

|                                                |                  |                   |       |                  |       |                |                   |       |                   |       |
|------------------------------------------------|------------------|-------------------|-------|------------------|-------|----------------|-------------------|-------|-------------------|-------|
| $\geq 3$                                       | 3,146<br>(32.9%) | 31,124<br>(37.6%) | 0.098 | 3,182<br>(33.2%) | 0.006 | 4,227 (40.8%)  | 7,846<br>(28.7%)  | 0.257 | 4,591<br>(42.6%)  | 0.037 |
| <b>No. of hospitalizations due to diabetes</b> |                  |                   |       |                  |       |                |                   |       |                   |       |
| <b>0</b>                                       | 9,521<br>(99.6%) | 78,850<br>(95.2%) | 0.279 | 9,554<br>(99.6%) | 0.001 | 10,270 (99.2%) | 27,037<br>(98.9%) | 0.031 | 10,692<br>(99.3%) | 0.014 |
| <b>1</b>                                       | 39 (0.4%)        | 3,660<br>(4.4%)   | 0.264 | 40 (0.4%)        | 0.001 | 76 (0.7%)      | 282 (1.0%)        | 0.032 | 71 (0.7%)         | 0.009 |
| $\geq 2$                                       | NTSR             | 339 (0.4%)        | 0.087 | NTSR             | 0.000 | NTSR           | 26 (0.1%)         | 0.003 | NTSR              | 0.018 |
| <b>No. of ED visit due to diabetes</b>         |                  |                   |       |                  |       |                |                   |       |                   |       |
| <b>0</b>                                       | 9,393<br>(98.2%) | 75,432<br>(91.0%) | 0.324 | 9,426<br>(98.2%) | 0.000 | 10,071 (97.3%) | 26,434<br>(96.7%) | 0.034 | 10,467<br>(97.2%) | 0.003 |
| <b>1</b>                                       | 151 (1.6%)       | 6,111<br>(7.4%)   | 0.283 | 152 (1.6%)       | 0.000 | 245 (2.4%)     | 756 (2.8%)        | 0.025 | 253 (2.4%)        | 0.001 |
| $\geq 2$                                       | 17 (0.2%)        | 1,306<br>(1.6%)   | 0.150 | 17 (0.2%)        | 0.000 | 39 (0.4%)      | 155 (0.6%)        | 0.028 | 48 (0.4%)         | 0.010 |
| <b>Physician encounters</b>                    |                  |                   |       |                  |       |                |                   |       |                   |       |
| <b>0</b>                                       | 76 (0.8%)        | 4,173<br>(5.0%)   | 0.254 | 75 (0.8%)        | 0.001 | 95 (0.9%)      | 612 (2.2%)        | 0.106 | 103 (1.0%)        | 0.004 |
| <b>1-3</b>                                     | 567 (5.9%)       | 8,828<br>(10.7%)  | 0.172 | 554 (5.8%)       | 0.007 | 564 (5.4%)     | 2,750<br>(10.1%)  | 0.173 | 583 (5.4%)        | 0.002 |
| <b>4-6</b>                                     | 1,499<br>(15.7%) | 12,005<br>(14.5%) | 0.033 | 1,479<br>(15.4%) | 0.007 | 1,585 (15.3%)  | 5,502<br>(20.1%)  | 0.126 | 1,559<br>(14.5%)  | 0.023 |
| $\geq 7$                                       | 7,419<br>(77.6%) | 57,843<br>(69.8%) | 0.177 | 7,486<br>(78.0%) | 0.010 | 8,111 (78.3%)  | 18,481<br>(67.6%) | 0.244 | 8,523<br>(79.2%)  | 0.020 |
| <b>ED visit (any reason)</b>                   |                  |                   |       |                  |       |                |                   |       |                   |       |
| <b>0</b>                                       | 6,808<br>(71.2%) | 35,073<br>(42.3%) | 0.609 | 6,859<br>(71.5%) | 0.006 | 7,348 (71.0%)  | 18,947<br>(69.3%) | 0.037 | 7,581<br>(70.4%)  | 0.012 |
| <b>1</b>                                       | 1,561<br>(16.3%) | 17,823<br>(21.5%) | 0.133 | 1,554<br>(16.2%) | 0.003 | 1,768 (17.1%)  | 4,728<br>(17.3%)  | 0.006 | 1,918<br>(17.8%)  | 0.019 |
| $\geq 2$                                       | 1,192            | 29,953            | 0.575 | 1,181            | 0.005 | 1,239 (12.0%)  | 3,670             | 0.044 | 1,269             | 0.006 |



SUPPLEMENTARY DATA

|                               |                  |                   |       |                  |       |               |                   |         |                  |       |
|-------------------------------|------------------|-------------------|-------|------------------|-------|---------------|-------------------|---------|------------------|-------|
|                               | (12.5%)          | (36.2%)           |       | (12.3%)          |       | (13.4%)       |                   | (11.8%) |                  |       |
| <b>Flu vaccine</b>            | 6,193<br>(64.8%) | 47,641<br>(57.5%) | 0.150 | 6,217<br>(64.8%) | 0.001 | 6,683 (64.5%) | 16,084<br>(58.8%) | 0.118   | 7,014<br>(65.1%) | 0.013 |
| <b>Low income<br/>subsidy</b> | 2,572<br>(26.9%) | 36,133<br>(43.6%) | 0.355 | 2,578<br>(26.9%) | 0.001 | 2,803 (27.1%) | 10,864<br>(39.7%) | 0.271   | 2,792<br>(25.9%) | 0.026 |
| <b>Lab results#</b>           |                  |                   |       |                  |       |               |                   |         |                  |       |
| <b>HbA1c††</b>                |                  |                   |       |                  |       |               |                   |         |                  |       |
| <7%                           | 3,080<br>(32.2%) | 23,885<br>(28.8%) | 0.073 | 3,051<br>(31.8%) | 0.009 | 2,741 (26.5%) | 9,316<br>(34.1%)  | 0.166   | 2,803<br>(26.0%) | 0.010 |
| (53mmol/mol)                  |                  |                   |       |                  |       |               |                   |         |                  |       |
| 7-9% (53-75<br>mmol/mol)      | 4,601<br>(48.1%) | 35,146<br>(42.4%) | 0.115 | 4,647<br>(48.5%) | 0.007 | 5,029 (48.6%) | 12,890<br>(47.1%) | 0.037   | 5,221<br>(48.5%) | 0.005 |
| >9%                           | 1,879<br>(19.7%) | 23,817<br>(28.7%) | 0.214 | 1,891<br>(19.7%) | 0.002 | 2,585 (25.0%) | 5,138<br>(18.8%)  | 0.150   | 2,740<br>(25.5%) | 0.013 |
| (75mmol/mol)                  |                  |                   |       |                  |       |               |                   |         |                  |       |
| <b>SBP††</b>                  |                  |                   |       |                  |       |               |                   |         |                  |       |
| <130 mmHg                     | 3,591<br>(37.6%) | 31,795<br>(38.4%) | 0.042 | 3,600<br>(37.5%) | 0.001 | 4,036 (39.0%) | 9,233<br>(33.8%)  | 0.111   | 4,234<br>(39.3%) | 0.009 |
| 130-139<br>mmHg               | 3,232<br>(33.8%) | 23,570<br>(28.5%) | 0.116 | 3,238<br>(33.8%) | 0.002 | 3,310 (32.0%) | 8,427<br>(30.8%)  | 0.040   | 3,388<br>(31.5%) | 0.012 |
| >=140 mmHg                    | 2,738<br>(28.7%) | 27,484<br>(33.2%) | 0.099 | 2,751<br>(28.7%) | 0.002 | 3,009 (29.1%) | 9,686<br>(35.4%)  | 0.137   | 3,141<br>(29.2%) | 0.008 |
| <b>DBP††</b>                  |                  |                   |       |                  |       |               |                   |         |                  |       |
| <80 mmHg                      | 5,680<br>(59.4%) | 52,952<br>(63.9%) | 0.093 | 5,688<br>(59.3%) | 0.002 | 6,209 (60.0%) | 15,905<br>(58.2%) | 0.053   | 6,434<br>(59.8%) | 0.009 |
| 80-89 mmHg                    | 3,310<br>(34.6%) | 23,503<br>(28.4%) | 0.135 | 3,326<br>(34.7%) | 0.002 | 3,419 (33.0%) | 8,469<br>(31.0%)  | 0.052   | 3,581<br>(33.3%) | 0.009 |
| >=90 mmHg                     | 572 (6.0%)       | 6,395<br>(7.7%)   | 0.074 | 575 (6.0%)       | 0.002 | 727 (7.0%)    | 2,971<br>(10.9%)  | 0.136   | 749 (7.0%)       | 0.006 |
| <b>LDL-C††</b>                |                  |                   |       |                  |       |               |                   |         |                  |       |
| <100 mg/dl                    | 7,220<br>(75.5%) | 62,906<br>(75.9%) | 0.027 | 7,238<br>(75.5%) | 0.002 | 7,717 (74.5%) | 18,975<br>(69.4%) | 0.115   | 8,076<br>(75.0%) | 0.013 |
| 100-129 mg/dl                 | 1,512<br>(15.8%) | 12,253<br>(14.8%) | 0.032 | 1,518<br>(15.8%) | 0.003 | 1,647 (15.9%) | 5,021<br>(18.4%)  | 0.065   | 1,692<br>(15.7%) | 0.008 |
| ≥130 mg/dl                    | 829 (8.7%)       | 7,690<br>(9.3%)   | 0.031 | 832 (8.7%)       | 0.001 | 990 (9.6%)    | 3,348<br>(12.2%)  | 0.087   | 995 (9.2%)       | 0.012 |

Abbreviations: No, number; DPP4i, dipeptidyl peptidase-4 inhibitors; SU, Sulfonylurea; TZD, Thiazolidinedione; GLP1RA, Glucagon-like peptide-1 receptor agonist; LAI, long acting insulin; ACE inhibitors, Angiotension-converting enzyme inhibitors; ARB, angiotension receptor blockers; CCBs,

## SUPPLEMENTARY DATA

calcium-channel blockers; ED, emergency department; NA, not applicable. HbA1c, hemoglobin A1c; SBP, systolic blood pressure; DBP, diastolic blood pressure; LDL-C, low-density lipoprotein cholesterol; NTSR: numbers too small (<11) to report based on Center for Medicare and Medicaid Services (CMS) rules and data use agreement.

\*The comparisons were defined by use of IBT and PS-weighted comparator. Covariates were measured in 12 months before cohort entry including the index date (New users appear to 100% have the treatment at baseline). Initiation defined as having no prescriptions of either drug class during the 12 months prior to initiation.

† The size of the population for a specific drug differed across cohorts because of the requirement not to have been treated prior to index date with the comparator drug class (Figure S1).

‡ Weighted by standardizing to their distribution in incretin-based therapy initiators by using weights of one for incretin-based therapy initiators and the odds of the estimated propensity score for comparator initiators.

§ Other eye disease included disorders of globe (ICD-9-CM 360), chorioretinal inflammation (ICD-9-CM 363), disorder of the iris or ciliary body (ICD-9-CM 364), visual disturbance (ICD-9-CM 368), keratitis (ICD-9-CM 370), corneal disorders (ICD-9-CM 371), disorders of the conjunctiva (ICD-9-CM 372), inflammation of eyelid (ICD-9-CM 373), other disorder of eyelid (ICD-9-CM 374), disorder of lacrimal system (ICD-9-CM 375), disorder of orbit (ICD-9-CM 376), optic nerve disorder (ICD-9-CM 377), strabismus (ICD-9-CM 378), and other disorders of eye (ICD-9-CM 379).

|| Patients with congestive baseline heart failure were excluded for GLP1RA vs TZD and DPP4i vs TZD comparison; and patients are required not to have been treated prior to index date with the comparator drug class.

¶ Diabetic nephropathy codes (250.40-250.43) were not included to identify chronic kidney disease (ICD-9-CM codes: 016.0; 095.4; 189.0; 189.9; 223.0; 236.91; 271.4; 274.1; 283.11; 403; 404; 440.1; 442.1; 572.4; 581-588; 591; 753.12-753.19; 753.2; 794.4).

\*\* Drugs may induce diabetic retinopathy or macular edema included tamoxifen, quinine, chloroquine, hydroxychloroquine, mefloquine, digoxin, ethambutol, peginterferonalfa 2a, peginterferonalfa 2b, interferon alfa-2b, interferon alfa n3, interferon alfacon 1, interferon beta 1a, interferon alfa 1b, isocarboxazid, sildenafil, isotretinoin, vigabatrin, fingolimod, doxetaxel, niacin, and latanoprost (ophthalmic).

#Based on the measure closest to index date.

†† For clinical measures, the distribution of covariates and standardized difference were the mean of results from multiple imputation (20 iterations) as each iteration produces different number of patients with each level of clinical measure, e.g. HbA1c <7% (53mmol/mol), 7-9% (53-75mmol/mol), >9% (75mmol/mol). Availability and distribution of clinical measures were shown in Table 1.

SUPPLEMENTARY DATA

**Supplementary Table 5. Crude and adjusted hazard ratios for advanced diabetic requiring treatment associated with use of incretin-based therapies compared with therapeutic alternatives based on multiple imputation of clinical measures (Hemoglobin A1c, blood pressure, and low-density lipoprotein cholesterol)\*†‡.**

| Comparison    | Cohort | No. of Patient | Median duration (yr) of treatment (IQR) | Person-yr | No. of Advanced diabetic retinopathy requiring treatment events | Advanced diabetic retinopathy requiring treatment rate per 1,000 patient-yr | Crude HR (95% CI) | PS weighting § HR (95% CI) |
|---------------|--------|----------------|-----------------------------------------|-----------|-----------------------------------------------------------------|-----------------------------------------------------------------------------|-------------------|----------------------------|
| DPP4i vs SU   | DPP4i  | 39,292         | 0.75 (0.41-1.67)                        | 50,222    | 349                                                             | 6.9 (6.3-7.7)                                                               | 1.10 (0.97-1.25)  | 0.94 (0.81-1.09)           |
|               | SU     | 87,073         | 0.87 (0.42-2.01)                        | 129,099   | 772                                                             | 6.0 (5.6-6.4)                                                               | 1.00 (reference)  | 1.00 (reference)           |
| DPP4i vs TZD  | DPP4i  | 51,410         | 0.80 (0.41-1.70)                        | 67,327    | 520                                                             | 7.7 (7.1-8.4)                                                               | 0.85 (0.73-0.98)  | 0.92 (0.74-1.15)           |
|               | TZD    | 22,231         | 0.74 (0.41-1.52)                        | 26,984    | 253                                                             | 9.4 (8.3-10.6)                                                              | 1.00 (reference)  | 1.00 (reference)           |
| GLP1RA vs LAI | GLP1RA | 9,561          | 0.59 (0.41-1.21)                        | 9,462     | 66                                                              | 7.0 (5.5-8.9)                                                               | 0.49 (0.39-0.63)  | 0.54 (0.42-0.71)           |
|               | LAI    | 82,849         | 0.67 (0.41-1.66)                        | 106,699   | 1,368                                                           | 12.8 (12.2-13.5)                                                            | 1.00 (reference)  | 1.00 (reference)           |
| GLP1RA vs TZD | GLP1RA | 10,355         | 0.58 (0.41-1.17)                        | 9,895     | 122                                                             | 10.7 (9.2-12.4)                                                             | 1.16 (0.94-1.42)  | 0.76 (0.53-1.10)           |
|               | TZD    | 27,345         | 0.78 (0.42-1.57)                        | 34,232    | 334                                                             | 7.6 (6.9-8.3)                                                               | 1.00 (reference)  | 1.00 (reference)           |

Abbreviations: Yr, year; ADRT, advanced diabetic retinopathy requiring treatment; IQR, interquartile range; HR, hazard ratio; PS, propensity score; CI, confidence interval; DPP4i, dipeptidyl peptidase-4 inhibitors; SU, Sulfonylurea; TZD, Thiazolidinedione; GLP1RA, Glucagon-like peptide-1 receptor agonist; LAI, long acting insulin.

\*Analysis based on as treated exposure definition, latency period is 30 days.

†The distribution of covariates and standardized difference of are shown in Table S3, S4. Availability and distribution of clinical measures are shown in Table 1. ‡We conducted MI (20 iterations) using fully conditional specification with logistic regression for clinical variables (HbA1c, SBP, DBP, LDL) in arbitrary missing pattern allowing generalized logit model for nominal response data as proportional odds assumption was violated.

§Propensity score weighted HR were standardized to the distribution of baseline covariates in incretin-based therapy initiators. The presented HR is obtained by pooling PS weighted HRs across the 20 adjusted HRs using log transformation.

SUPPLEMENTARY DATA

**Supplementary Table 6. Crude and adjusted hazard ratios for advanced diabetic retinopathy requiring treatment associated with use of incretin-based therapies compared with therapeutic alternatives according to Hemoglobin A1c tertiles\*†‡.**

| Stratum                | Comparison    | Cohort | No. of Patients  | Median duration (yr) of treatment (IQR) | Person -yr | No. of Advanced diabetic retinopathy requiring treatment events | Advanced diabetic retinopathy rate per 1,000 person-yr | Crude HR (95% CI) | PS weighting § HR (95% CI) |
|------------------------|---------------|--------|------------------|-----------------------------------------|------------|-----------------------------------------------------------------|--------------------------------------------------------|-------------------|----------------------------|
| HbA1c tertiles†        |               |        |                  |                                         |            |                                                                 |                                                        |                   |                            |
| <7% (53mmol/mol)       | DPP4i vs SU   | DPP4i  | 17,155           | 0.80 (0.41-1.77)                        | 22,895     | 61                                                              | 2.7 (2.1-3.4)                                          | 0.98 (0.66-1.46)  | 0.85 (0.55-1.32)           |
|                        |               | SU     | 38,589           | 0.88 (0.42-2.06)                        | 58,346     | 153                                                             | 2.6 (2.2-3.1)                                          | 1.00 (reference)  | 1.00 (reference)           |
|                        | DPP4i vs TZD  | DPP4i  | 17,024           | 0.81 (0.41-1.77)                        | 22,990     | 112                                                             | 4.9 (4.0-5.8)                                          | 0.73 (0.48-1.09)  | 0.85 (0.48-1.48)           |
|                        |               | TZD    | 7,863            | 0.75 (0.41-1.56)                        | 9,759      | 67                                                              | 6.9 (5.4-8.7)                                          | 1.00 (reference)  | 1.00 (reference)           |
|                        | GLP1RA vs LAI | GLP1RA | 3,080            | 0.58 (0.41-1.20)                        | 3,088      | 16                                                              | 5.1 (3.1-8.3)                                          | 0.51 (0.25-1.06)  | 0.45 (0.21-0.94)           |
|                        |               | LAI    | 23,885           | 0.60 (0.41-1.51)                        | 29,004     | 260                                                             | 9.0 (7.9-10.1)                                         | 1.00 (reference)  | 1.00 (reference)           |
| GLP1RA vs TZD          | GLP1RA        | 2,741  | 0.59 (0.41-1.18) | 2,682                                   | 19         | 7.0 (4.5-10.9)                                                  | 0.97 (0.50-1.91)                                       | 0.77 (0.24-2.46)  |                            |
|                        | TZD           | 9,316  | 0.80 (0.44-1.61) | 12,023                                  | 77         | 6.4 (5.1-8.0)                                                   | 1.00 (reference)                                       | 1.00 (reference)  |                            |
| 7-9 % (53-75 mmol/mol) | DPP4i vs SU   | DPP4i  | 15,078           | 0.75 (0.41-1.66)                        | 19,190     | 162                                                             | 8.4 (7.2-9.8)                                          | 1.17 (0.92-1.49)  | 0.99 (0.75-1.30)           |
|                        |               | SU     | 32,919           | 0.90 (0.46-2.07)                        | 49,925     | 338                                                             | 6.8 (6.1-7.5)                                          | 1.00 (reference)  | 1.00 (reference)           |
|                        | DPP4i vs TZD  | DPP4i  | 24,629           | 0.81 (0.41-1.69)                        | 32,157     | 266                                                             | 8.3 (7.3-9.3)                                          | 0.91 (0.71-1.16)  | 0.99 (0.70-1.41)           |
|                        |               | TZD    | 10,080           | 0.74 (0.41-1.52)                        | 12,226     | 114                                                             | 9.3 (7.8-11.2)                                         | 1.00 (reference)  | 1.00 (reference)           |
|                        | GLP1RA vs LAI | GLP1RA | 4,601            | 0.60 (0.41-1.23)                        | 4,599      | 28                                                              | 6.1 (4.2-8.8)                                          | 0.54 (0.34-0.84)  | 0.58 (0.37-0.91)           |
|                        |               | LAI    | 35,146           | 0.72 (0.41-1.78)                        | 47,377     | 486                                                             | 10.3 (9.4-11.2)                                        | 1.00 (reference)  | 1.00 (reference)           |
| GLP1RA vs TZD          | GLP1RA        | 5,029  | 0.59 (0.41-1.18) | 4,862                                   | 59         | 12.2 (9.4-15.7)                                                 | 1.13 (0.74-1.73)                                       | 0.75 (0.39-1.45)  |                            |
|                        | TZD           | 12,890 | 0.79 (0.43-1.56) | 16,096                                  | 161        | 10.0 (8.6-11.7)                                                 | 1.00 (reference)                                       | 1.00 (reference)  |                            |
| >9% (75 mmol/mol)      | DPP4i vs SU   | DPP4i  | 7,059            | 0.67 (0.41-1.48)                        | 8,137      | 126                                                             | 15.5 (13.0-18.5)                                       | 1.08 (0.79-1.49)  | 0.93 (0.65-1.32)           |
|                        |               | SU     | 15,565           | 0.79 (0.41-1.77)                        | 20,828     | 282                                                             | 13.5 (12.0-15.2)                                       | 1.00 (reference)  | 1.00 (reference)           |
|                        | DPP4i vs TZD  | DPP4i  | 9,758            | 0.76 (0.41-1.63)                        | 12,180     | 143                                                             | 11.7 (10.0-13.8)                                       | 0.85 (0.60-1.21)  | 0.88 (0.56-1.39)           |
|                        |               | TZD    | 4,288            | 0.72 (0.41-1.46)                        | 4,999      | 72                                                              | 14.3 (11.3-18.0)                                       | 1.00 (reference)  | 1.00 (reference)           |
|                        | GLP1RA vs LAI | GLP1RA | 1,879            | 0.58 (0.41-1.17)                        | 1,776      | 22                                                              | 12.6 (8.3-19.1)                                        | 0.55 (0.33-0.91)  | 0.58 (0.35-0.96)           |
|                        |               | LAI    | 23,817           | 0.68 (0.41-1.65)                        | 30,318     | 622                                                             | 20.5 (19.0-22.2)                                       | 1.00 (reference)  | 1.00 (reference)           |
| GLP1RA vs TZD          | GLP1RA        | 2,585  | 0.58 (0.41-1.11) | 2,351                                   | 44         | 18.7 (13.9-25.2)                                                | 1.08 (0.68-1.72)                                       | 0.77 (0.36-1.65)  |                            |
|                        | TZD           | 5,138  | 0.74 (0.41-1.50) | 6,113                                   | 96         | 15.8 (12.9-19.3)                                                | 1.00 (reference)                                       | 1.00 (reference)  |                            |

Abbreviations: Hemoglobin A1c , HbA1c; Yr, year; IQR, interquartile range; HR, hazard ratio; PS, propensity score; CI, confidence interval; DPP4i, DPP-4 inhibitor; SU, Sulfonylurea; TZD, Thiazolidinedione; GLP, GLP-1 receptor agonist; LAI, long acting insulin;NTSR: numbers too small (<11) to report based on Center for Medicare and Medicaid Services (CMS) rules and data use agreement.

\*Analysis based on as treated exposure definition, latency period is 30 days.

## SUPPLEMENTARY DATA

† The distribution of covariates and standardized difference of HbA1c are shown in Table S3, S4. Availability and distribution of HbA1c are shown in Table 1.

‡ We conducted MI (20 iterations) using fully conditional specification with logistic regression for clinical variables (HbA1c, SBP, DBP, LDL) in arbitrary missing pattern allowing generalized logit model for nominal response data as proportional odds assumption was violated.

§ Propensity score weighted HR were standardized to the distribution of baseline covariates in incretin-based therapy initiators. As each iteration produces different number of patients with HbA1c <7% (53mmol/mol), 7-9% (53-75mmol/mol), >9% (75mmol/mol), we reported the mean of sample size, median duration of treatment, person-year, number of events, rate, and the pooled crude HR and pooled PS weighted HR across the 20 estimates using log transformation.

SUPPLEMENTARY DATA

**Supplementary Table 7. Crude and adjusted hazard ratios for advanced diabetic retinopathy requiring treatment associated with use of incretin-based therapies compared with therapeutic alternatives according to presence or not of hypertension and use of angiotension-converting enzyme inhibitors or angiotension receptor blocker at cohort entry\*.**

| Stratum                        | Comparison    | Cohort        | No. of Patients | Median duration (yr) of treatment (IQR) | Person-yr | No. of advanced diabetic retinopathy requiring treatment Events | Advanced diabetic retinopathy requiring treatment rate per 1,000 person-yr | Crude HR (95% CI) | PS weighting† HR (95% CI) |
|--------------------------------|---------------|---------------|-----------------|-----------------------------------------|-----------|-----------------------------------------------------------------|----------------------------------------------------------------------------|-------------------|---------------------------|
| <b>Hypertension</b>            |               |               |                 |                                         |           |                                                                 |                                                                            |                   |                           |
| No pre-existing hypertension   | DPP4i vs SU   | DPP4i vs SU   | 3,053           | 0.78 (0.41-1.70)                        | 3,989     | 29                                                              | 7.3 (5.0-10.5)                                                             | 0.81 (0.54-1.22)  | 0.82 (0.53-1.29)          |
|                                |               |               | 7,901           | 0.85 (0.46-2.07)                        | 11,961    | 102                                                             | 8.5 (7.0-10.4)                                                             | 1.00 (reference)  | 1.00 (reference)          |
|                                | DPP4i vs TZD  | DPP4i vs TZD  | 4,094           | 0.79 (0.41-1.72)                        | 5,421     | 50                                                              | 9.2 (7.0-12.2)                                                             | 0.85 (0.55-1.33)  | 1.12 (0.62-2.03)          |
|                                |               |               | 2,272           | 0.78 (0.43-1.62)                        | 2,896     | 32                                                              | 11.0 (7.8-15.7)                                                            | 1.00 (reference)  | 1.00 (reference)          |
|                                | GLP1RA vs LAI | GLP1RA vs LAI | 764             | 0.58 (0.41-1.16)                        | 762       | NTSR                                                            | 5.3 (2.0-14.0)                                                             | 0.25 (0.09-0.67)  | 0.34 (0.12-0.95)          |
|                                |               |               | 5,831           | 0.70 (0.41-1.72)                        | 7,810     | 145                                                             | 18.6 (15.7-21.9)                                                           | 1.00 (reference)  | 1.00 (reference)          |
|                                | GLP1RA vs TZD | GLP1RA vs TZD | 766             | 0.58 (0.41-1.04)                        | 705       | NTSR                                                            | 9.9 (4.7-21.0)                                                             | 0.72 (0.33-1.57)  | 0.98 (0.40-2.38)          |
|                                |               |               | 2,682           | 0.82 (0.50-1.68)                        | 3,537     | 43                                                              | 12.2 (9.0-16.4)                                                            | 1.00 (reference)  | 1.00 (reference)          |
| With pre-existing Hypertension | DPP4i vs SU   | DPP4i vs SU   | 36,239          | 0.75 (0.41-1.67)                        | 46,233    | 320                                                             | 6.9 (6.2-7.7)                                                              | 1.14 (1.00-1.31)  | 0.92 (0.80-1.06)          |
|                                |               |               | 79,172          | 0.87 (0.42-2.00)                        | 117,138   | 670                                                             | 5.7 (5.3-6.2)                                                              | 1.00 (reference)  | 1.00 (reference)          |
|                                | DPP4i vs TZD  | DPP4i vs TZD  | 47,316          | 0.80 (0.41-1.70)                        | 61,906    | 470                                                             | 7.6 (6.9-8.3)                                                              | 0.85 (0.73-1.00)  | 0.91 (0.74-1.12)          |
|                                |               |               | 19,959          | 0.74 (0.41-1.51)                        | 24,088    | 221                                                             | 9.2 (8.0-10.5)                                                             | 1.00 (reference)  | 1.00 (reference)          |
|                                | GLP1RA vs LAI | GLP1RA vs LAI | 8,797           | 0.59 (0.41-1.21)                        | 8,701     | 62                                                              | 7.1 (5.6-9.1)                                                              | 0.53 (0.41-0.68)  | 0.53 (0.40-0.68)          |
|                                |               |               | 77,018          | 0.67 (0.41-1.66)                        | 98,889    | 1,223                                                           | 12.4 (11.7-13.1)                                                           | 1.00 (reference)  | 1.00 (reference)          |
|                                | GLP1RA vs TZD | GLP1RA vs TZD | 9,589           | 0.58 (0.41-1.17)                        | 9,190     | 115                                                             | 12.5 (10.4-15.0)                                                           | 1.21 (0.98-1.50)  | 0.75 (0.53-1.08)          |
|                                |               |               | 24,663          | 0.77 (0.41-1.56)                        | 30,695    | 291                                                             | 9.5 (8.4-10.6)                                                             | 1.00 (reference)  | 1.00 (reference)          |
| <b>ACE inhibitors/ARB</b>      |               |               |                 |                                         |           |                                                                 |                                                                            |                   |                           |
| No baseline ACE inhibitors/ARB | DPP4i vs SU   | DPP4i vs SU   | 10,550          | 0.69 (0.41-1.54)                        | 12,746    | 73                                                              | 5.7 (4.6-7.2)                                                              | 0.90 (0.70-1.18)  | 0.76 (0.58-1.01)          |
|                                |               |               | 27,578          | 0.82 (0.41-1.91)                        | 39,472    | 235                                                             | 6.0 (5.2-6.8)                                                              | 1.00 (reference)  | 1.00 (reference)          |
|                                | DPP4i vs TZD  | DPP4i vs TZD  | 12,722          | 0.76 (0.41-1.65)                        | 16,190    | 103                                                             | 6.4 (5.2-7.7)                                                              | 0.72 (0.53-0.98)  | 0.81 (0.54-1.21)          |
|                                |               |               | 6,152           | 0.70 (0.41-1.44)                        | 7,259     | 66                                                              | 9.1 (7.1-11.6)                                                             | 1.00 (reference)  | 1.00 (reference)          |
|                                | GLP1RA vs LAI | GLP1RA vs LAI | 2,171           | 0.58 (0.41-1.10)                        | 2,024     | 16                                                              | 7.9 (4.8-12.9)                                                             | 0.51 (0.31-0.84)  | 0.49 (0.29-0.82)          |
|                                |               |               | 24,304          | 0.62 (0.41-1.50)                        | 29,041    | 398                                                             | 13.7 (12.4-15.1)                                                           | 1.00 (reference)  | 1.00 (reference)          |
|                                | GLP1RA vs TZD | GLP1RA vs TZD | 2,204           | 0.58 (0.41-1.10)                        | 2,040     | 23                                                              | 11.3 (7.5-17.0)                                                            | 1.08 (0.68-1.70)  | 0.79 (0.39-1.63)          |
|                                |               |               | 7,251           | 0.73 (0.41-1.49)                        | 8,760     | 83                                                              | 9.5 (7.6-11.8)                                                             | 1.00 (reference)  | 1.00 (reference)          |
| With baseline ACE              | DPP4i vs      | DPP4i         | 28,742          | 0.77 (0.41-1.73)                        | 37,477    | 276                                                             | 7.4 (6.5-8.3)                                                              | 1.16 (1.01-1.34)  | 0.96 (0.82-1.12)          |

## SUPPLEMENTARY DATA

|                |          |        |        |                  |        |     |                  |                  |                  |
|----------------|----------|--------|--------|------------------|--------|-----|------------------|------------------|------------------|
| inhibitors/ARB | SU       | SU     | 59,495 | 0.90 (0.44-2.06) | 89,627 | 537 | 6.0 (5.5-6.5)    | 1.00 (reference) | 1.00 (reference) |
|                | DPP4i vs | DPP4i  | 38,688 | 0.81 (0.41-1.72) | 51,137 | 417 | 8.2 (7.4-9.0)    | 0.88 (0.74-1.05) | 0.96 (0.76-1.20) |
|                | TZD      | TZD    | 16,079 | 0.75 (0.41-1.55) | 19,725 | 187 | 9.5 (8.2-10.9)   | 1.00 (reference) | 1.00 (reference) |
|                | GLP1RA   | GLP1RA | 7,390  | 0.60 (0.41-1.24) | 7,438  | 50  | 6.7 (5.1-8.9)    | 0.49 (0.37-0.66) | 0.51 (0.38-0.68) |
|                | vs LAI   | LAI    | 58,545 | 0.70 (0.41-1.73) | 77,657 | 970 | 12.5 (11.7-13.3) | 1.00 (reference) | 1.00 (reference) |
|                | GLP1RA   | GLP1RA | 8,151  | 0.58 (0.41-1.18) | 7,855  | 99  | 12.6 (10.3-15.4) | 1.17 (0.93-1.48) | 0.73 (0.49-1.07) |
|                | vs TZD   | TZD    | 20,094 | 0.81 (0.45-1.59) | 25,472 | 251 | 9.9 (8.7-11.2)   | 1.00 (reference) | 1.00 (reference) |

Abbreviations: Yr, year; IQR, interquartile range; HR, hazard ratio; PS, propensity score; CI, confidence interval; DPP4i, DPP-4 inhibitor; SU, Sulfonylurea; TZD, Thiazolidinedione; GLP, GLP-1 receptor agonist; LAI, long acting insulin; angiotension-converting enzyme inhibitors, ACEI; ARB, angiotension receptor blocker; NTSR: numbers too small (<11) to report based on Center for Medicare and Medicaid Services (CMS) rules and data use agreement.

\*Analysis based on as treated exposure definition, latency period is 30 days.

†Propensity score weighted HR were standardized to the distribution of baseline covariates in incretin-based therapy initiators.

SUPPLEMENTARY DATA

**Supplementary Table 8. Crude and adjusted hazard ratios for advanced diabetic retinopathy requiring treatment associated with use of individual incretin-based therapy compared with therapeutic alternatives\*†.**

| Stratum        | Comparison         | Cohort          | No. of Patients  | Median duration (yr) of treatment (IQR) | Person-yr | No. of Advanced diabetic retinopathy requiring treatment events | Advanced diabetic retinopathy requiring treatment rate per 1,000 person-yr | Crude HR (95% CI) | PS weighting† HR (95% CI) |
|----------------|--------------------|-----------------|------------------|-----------------------------------------|-----------|-----------------------------------------------------------------|----------------------------------------------------------------------------|-------------------|---------------------------|
| <b>DPP4i†</b>  |                    |                 |                  |                                         |           |                                                                 |                                                                            |                   |                           |
| DPP4i vs SU    | Sitagliptin vs SU  | Sitagliptin SU  | 29,613           | 0.76 (0.41-1.72)                        | 39,064    | 266                                                             | 6.8 (6.0-7.7)                                                              | 1.09 (0.95-1.26)  | 0.91 (0.79-1.06)          |
|                |                    |                 | 87,073           | 0.87 (0.42-2.01)                        | 129,099   | 772                                                             | 6.0 (5.6-6.4)                                                              | 1.00 (reference)  | 1.00 (reference)          |
|                | Saxagliptin vs SU  | Saxagliptin SU  | 5,251            | 0.91 (0.46-2.05)                        | 7,411     | 44                                                              | 5.9 (4.4-8.0)                                                              | 0.95 (0.70-1.29)  | 0.88 (0.64-1.20)          |
|                |                    |                 | 87,073           | 0.87 (0.42-2.01)                        | 129,099   | 772                                                             | 6.0 (5.6-6.4)                                                              | 1.00 (reference)  | 1.00 (reference)          |
|                | Linagliptin vs SU  | Linagliptin SU  | 4,259            | 0.58 (0.38-1.15)                        | 3,614     | 38                                                              | 10.5 (7.6-14.5)                                                            | 1.40 (1.01-1.95)  | 0.97 (0.68-1.37)          |
|                |                    | 87,073          | 0.87 (0.42-2.01) | 129,099                                 | 772       | 6.0 (5.6-6.4)                                                   | 1.00 (reference)                                                           | 1.00 (reference)  |                           |
|                | Alogliptin vs SU   | Alogliptin SU   | 158              | 0.58 (0.41-1.06)                        | 120       | NTSR                                                            | NA                                                                         | NA                | NA                        |
|                |                    |                 | 87,073           | 0.87 (0.42-2.01)                        | 129,099   | 772                                                             | 6.0 (5.6-6.4)                                                              | 1.00 (reference)  | 1.00 (reference)          |
| DPP4i vs TZD   | Sitagliptin vs TZD | Sitagliptin TZD | 39,020           | 0.82 (0.41-1.75)                        | 52,920    | 401                                                             | 7.6 (6.9-8.4)                                                              | 0.84 (0.72-0.99)  | 0.91 (0.75-1.10)          |
|                |                    |                 | 22,231           | 0.74 (0.41-1.52)                        | 26,984    | 253                                                             | 9.4 (8.3-10.6)                                                             | 1.00 (reference)  | 1.00 (reference)          |
|                | Saxagliptin vs TZD | Saxagliptin TZD | 6,847            | 0.91 (0.50-2.01)                        | 9,670     | 62                                                              | 6.4 (5.0-8.2)                                                              | 0.71 (0.54-0.93)  | 0.80 (0.58-1.10)          |
|                |                    |                 | 22,231           | 0.74 (0.41-1.52)                        | 26,984    | 253                                                             | 9.4 (8.3-10.6)                                                             | 1.00 (reference)  | 1.00 (reference)          |
|                | Linagliptin vs TZD | Linagliptin TZD | 5,395            | 0.58 (0.41-1.18)                        | 4,630     | 55                                                              | 11.9 (9.1-15.5)                                                            | 1.12 (0.83-1.50)  | 1.17 (0.77-1.78)          |
|                |                    | 22,231          | 0.74 (0.41-1.52) | 26,984                                  | 253       | 9.4 (8.3-10.6)                                                  | 1.00 (reference)                                                           | 1.00 (reference)  |                           |
|                | Alogliptin vs TZD  | Alogliptin TZD  | 132              | 0.54 (0.41-0.87)                        | 88        | NTSR                                                            | 11.4 (1.6-81.5)                                                            | 0.97 (0.14-6.93)  | 1.52 (0.21-11.21)         |
|                |                    |                 | 22,231           | 0.74 (0.41-1.52)                        | 26,984    | 253                                                             | 9.4 (8.3-10.6)                                                             | 1.00 (reference)  | 1.00 (reference)          |
| <b>GLP1RA†</b> |                    |                 |                  |                                         |           |                                                                 |                                                                            |                   |                           |
| GLP1RA vs LAI  | Exenatide vs LAI   | Exenatide LAI   | 3,862            | 0.59 (0.41-1.21)                        | 4,127     | 25                                                              | 6.1 (4.1-9.0)                                                              | 0.44 (0.30-0.66)  | 0.44 (0.30-0.65)          |
|                |                    |                 | 82,849           | 0.67 (0.41-1.66)                        | 106,699   | 1,368                                                           | 12.8 (12.2-13.5)                                                           | 1.00 (reference)  | 1.00 (reference)          |
|                | Liraglutide vs LAI | Liraglutide LAI | 5,420            | 0.61 (0.41-1.25)                        | 5,250     | 41                                                              | 7.8 (5.7-10.6)                                                             | 0.55 (0.40-0.75)  | 0.57 (0.41-0.78)          |
|                |                    |                 | 82,849           | 0.67 (0.41-1.66)                        | 106,699   | 1,368                                                           | 12.8 (12.2-13.5)                                                           | 1.00 (reference)  | 1.00 (reference)          |
|                | Albiglutide vs LAI | Albiglutide LAI | 111              | 0.35 (0.16-0.52)                        | 39        | NTSR                                                            | NA                                                                         | NA                | NA                        |
|                |                    | 82,849          | 0.67 (0.41-1.66) | 106,699                                 | 1,368     | 12.8 (12.2-13.5)                                                | 1.00 (reference)                                                           | 1.00 (reference)  |                           |
|                | Dulaglutide vs LAI | Dulaglutide LAI | 166              | 0.24 (0.12-0.40)                        | 45        | NTSR                                                            | NA                                                                         | NA                | NA                        |
|                |                    |                 | 82,849           | 0.67 (0.41-1.66)                        | 106,699   | 1,368                                                           | 12.8 (12.2-13.5)                                                           | 1.00 (reference)  | 1.00 (reference)          |
| GLP1RA vs TZD  | Exenatide vs TZD   | Exenatide TZD   | 3,567            | 0.58 (0.41-1.14)                        | 3,700     | 33                                                              | 8.9 (6.3-12.6)                                                             | 0.87 (0.61-1.24)  | 0.62 (0.42-0.93)          |
|                |                    |                 | 27,345           | 0.78 (0.42-1.57)                        | 34,232    | 334                                                             | 9.8 (8.8-10.9)                                                             | 1.00 (reference)  | 1.00 (reference)          |
|                | Liraglutide vs TZD | Liraglutide TZD | 6,395            | 0.61 (0.41-1.23)                        | 6,069     | 88                                                              | 14.5 (11.8-17.9)                                                           | 1.35 (1.07-1.71)  | 0.84 (0.56-1.24)          |
|                |                    | 27,345          | 0.78 (0.42-1.57) | 34,232                                  | 334       | 9.8 (8.8-10.9)                                                  | 1.00 (reference)                                                           | 1.00 (reference)  |                           |



## SUPPLEMENTARY DATA

|                       |                    |               |                                      |              |             |                                    |                                      |                                      |
|-----------------------|--------------------|---------------|--------------------------------------|--------------|-------------|------------------------------------|--------------------------------------|--------------------------------------|
| Albiglutide vs<br>TZD | Albiglutide<br>TZD | 169<br>27,345 | 0.35 (0.18-0.51)<br>0.78 (0.42-1.57) | 62<br>34,232 | NTSR<br>334 | 16.1 (2.3-114.5)<br>9.8 (8.8-10.9) | 1.15 (0.16-8.23)<br>1.00 (reference) | 0.71 (0.08-6.06)<br>1.00 (reference) |
| Dulaglutide vs<br>TZD | Dulaglutide<br>TZD | 221<br>27,345 | 0.26 (0.13-0.41)<br>0.78 (0.42-1.57) | 63<br>34,232 | NTSR<br>334 | NA<br>9.8 (8.8-10.9)               | NA<br>1.00 (reference)               | NA<br>1.00 (reference)               |

Abbreviations: Yr, year; IQR, interquartile range; HR, hazard ratio; PS, propensity score; CI, confidence interval; DPP4i, DPP-4 inhibitor; SU, Sulfonylurea; TZD, Thiazolidinedione; GLP, GLP-1 receptor agonist; LAI, long acting insulin; NA, not applicable; NTSR: numbers too small (<11) to report based on Center for Medicare and Medicaid Services (CMS) rules and data use agreement.

\*Analysis based on as treated exposure definition, latency period is 30 days.

†Patients initiated two incretin-based therapies in the same class (e.g. sitagliptin and saxagliptin) on the same day were excluded. Patients were censored when switching from one incretin-based therapy to another incretin-based therapy in the same class (e.g. from sitagliptin to saxagliptin).

‡Propensity score weighted HR were standardized to the distribution of baseline covariates in incretin-based therapy initiators.

SUPPLEMENTARY DATA

**Supplementary Table 9. Crude and adjusted hazard ratios for advanced retinopathy requiring treatment associated with use of incretin-based therapies compared with therapeutic alternatives for various latency period\*.**

| Latency period† | Comparison    | Cohort | No. of Patient   | Median duration (yr) of treatment (IQR) | Person-yr | No. of advanced diabetic retinopathy requiring treatment events | Advanced diabetic retinopathy requiring treatment rate per 1,000 patient-yr | Crude HR (95% CI) | PS weighting† HR (95% CI) |
|-----------------|---------------|--------|------------------|-----------------------------------------|-----------|-----------------------------------------------------------------|-----------------------------------------------------------------------------|-------------------|---------------------------|
| 0-day latency   | DPP4i vs SU   | DPP4i  | 39,292           | 0.70 (0.33-1.63)                        | 48,313    | 335                                                             | 6.9 (6.2-7.7)                                                               | 1.12 (0.98-1.27)  | 0.93 (0.81-1.06)          |
|                 |               | SU     | 87,072           | 0.82 (0.39-1.97)                        | 124,984   | 733                                                             | 5.9 (5.5-6.3)                                                               | 1.00 (reference)  | 1.00 (reference)          |
|                 | DPP4i vs TZD  | DPP4i  | 51,410           | 0.74 (0.37-1.66)                        | 64,937    | 497                                                             | 7.7 (7.0-8.4)                                                               | 0.87 (0.74-1.01)  | 0.94 (0.76-1.15)          |
|                 |               | TZD    | 22,231           | 0.67 (0.33-1.46)                        | 25,602    | 233                                                             | 9.1 (8.0-10.4)                                                              | 1.00 (reference)  | 1.00 (reference)          |
|                 | GLP1RA vs LAI | GLP1RA | 9,561            | 0.53 (0.33-1.15)                        | 8,944     | 65                                                              | 7.3 (5.7-9.3)                                                               | 0.51 (0.40-0.66)  | 0.52 (0.40-0.67)          |
|                 |               | LAI    | 82,846           | 0.62 (0.33-1.63)                        | 103,173   | 1,317                                                           | 12.8 (12.1-13.5)                                                            | 1.00 (reference)  | 1.00 (reference)          |
| GLP1RA vs TZD   | GLP1RA        | 10,355 | 0.53 (0.33-1.12) | 9,395                                   | 115       | 12.2 (10.2-14.7)                                                | 1.18 (0.95-1.46)                                                            | 0.83 (0.58-1.18)  |                           |
| TZD             | TZD           | 27,345 | 0.73 (0.40-1.50) | 32,620                                  | 310       | 9.5 (8.5-10.6)                                                  | 1.00 (reference)                                                            | 1.00 (reference)  |                           |
| 60-day latency  | DPP4i vs SU   | DPP4i  | 39,292           | 0.81 (0.50-1.72)                        | 52,076    | 360                                                             | 6.9 (6.2-7.7)                                                               | 1.07 (0.95-1.22)  | 0.89 (0.78-1.02)          |
|                 |               | SU     | 87,073           | 0.92 (0.50-2.05)                        | 133,096   | 811                                                             | 6.1 (5.7-6.5)                                                               | 1.00 (reference)  | 1.00 (reference)          |
|                 | DPP4i vs TZD  | DPP4i  | 51,410           | 0.85 (0.50-1.75)                        | 69,649    | 542                                                             | 7.8 (7.1-8.5)                                                               | 0.85 (0.73-0.98)  | 0.90 (0.74-1.09)          |
|                 |               | TZD    | 22,231           | 0.81 (0.50-1.59)                        | 28,344    | 267                                                             | 9.4 (8.4-10.6)                                                              | 1.00 (reference)  | 1.00 (reference)          |
|                 | GLP1RA vs LAI | GLP1RA | 9,561            | 0.66 (0.50-1.26)                        | 9,966     | 69                                                              | 6.9 (5.5-8.8)                                                               | 0.49 (0.38-0.62)  | 0.50 (0.39-0.64)          |
|                 |               | LAI    | 82,849           | 0.73 (0.50-1.70)                        | 110,101   | 1,423                                                           | 12.9 (12.3-13.6)                                                            | 1.00 (reference)  | 1.00 (reference)          |
| GLP1RA vs TZD   | GLP1RA        | 10,355 | 0.66 (0.50-1.21) | 10,376                                  | 128       | 12.3 (10.4-14.7)                                                | 1.15 (0.94-1.41)                                                            | 0.74 (0.53-1.02)  |                           |
| TZD             | TZD           | 27,345 | 0.84 (0.50-1.63) | 35,816                                  | 351       | 9.8 (8.8-10.9)                                                  | 1.00 (reference)                                                            | 1.00 (reference)  |                           |
| 90-day latency  | DPP4i vs SU   | DPP4i  | 39,292           | 0.86 (0.58-1.77)                        | 53,873    | 377                                                             | 7.0 (6.3-7.7)                                                               | 1.08 (0.96-1.22)  | 0.90 (0.79-1.03)          |
|                 |               | SU     | 87,073           | 0.99 (0.58-2.09)                        | 136,981   | 838                                                             | 6.1 (5.7-6.5)                                                               | 1.00 (reference)  | 1.00 (reference)          |
|                 | DPP4i vs TZD  | DPP4i  | 51,410           | 0.91 (0.58-1.80)                        | 71,904    | 553                                                             | 7.7 (7.1-8.4)                                                               | 0.84 (0.72-0.97)  | 0.88 (0.73-1.07)          |
|                 |               | TZD    | 22,231           | 0.87 (0.58-1.65)                        | 29,684    | 279                                                             | 9.4 (8.4-10.6)                                                              | 1.00 (reference)  | 1.00 (reference)          |
|                 | GLP1RA vs LAI | GLP1RA | 9,561            | 0.74 (0.57-1.32)                        | 10,457    | 71                                                              | 6.8 (5.4-8.6)                                                               | 0.48 (0.38-0.61)  | 0.49 (0.38-0.63)          |
|                 |               | LAI    | 82,849           | 0.77 (0.57-1.74)                        | 113,390   | 1,477                                                           | 13.0 (12.4-13.7)                                                            | 1.00 (reference)  | 1.00 (reference)          |
| GLP1RA vs TZD   | GLP1RA        | 10,355 | 0.74 (0.57-1.26) | 10,840                                  | 132       | 12.2 (10.3-14.5)                                                | 1.14 (0.94-1.40)                                                            | 0.73 (0.53-1.00)  |                           |
| TZD             | TZD           | 27,345 | 0.91 (0.58-1.69) | 37,373                                  | 365       | 9.8 (8.8-10.8)                                                  | 1.00 (reference)                                                            | 1.00 (reference)  |                           |
| 180-day latency | DPP4i vs SU   | DPP4i  | 39,292           | 1.03 (0.75-1.91)                        | 58,966    | 419                                                             | 7.1 (6.5-7.8)                                                               | 1.10 (0.98-1.24)  | 0.91 (0.81-1.03)          |
|                 |               | SU     | 87,073           | 1.14 (0.82-2.22)                        | 148,018   | 908                                                             | 6.1 (5.7-6.5)                                                               | 1.00 (reference)  | 1.00 (reference)          |
|                 | DPP4i vs TZD  | DPP4i  | 51,410           | 1.07 (0.82-1.93)                        | 78,303    | 608                                                             | 7.8 (7.2-8.4)                                                               | 0.82 (0.72-0.94)  | 0.86 (0.72-1.02)          |
|                 |               | TZD    | 22,231           | 1.07 (0.82-1.83)                        | 33,587    | 321                                                             | 9.6 (8.6-10.7)                                                              | 1.00 (reference)  | 1.00 (reference)          |
|                 | GLP1RA vs LAI | GLP1RA | 9,561            | 0.96 (0.69-1.48)                        | 11,858    | 82                                                              | 6.9 (5.6-8.6)                                                               | 0.49 (0.39-0.62)  | 0.51 (0.41-0.64)          |
|                 |               | LAI    | 82,849           | 0.99 (0.72-1.85)                        | 122,650   | 1,605                                                           | 13.1 (12.5-13.7)                                                            | 1.00 (reference)  | 1.00 (reference)          |

## SUPPLEMENTARY DATA

|           |        |        |                  |        |     |                 |                  |                  |
|-----------|--------|--------|------------------|--------|-----|-----------------|------------------|------------------|
| GLP1RA vs | GLP1RA | 10,355 | 0.93 (0.64-1.41) | 12,144 | 142 | 11.7 (9.9-13.8) | 1.10 (0.91-1.34) | 0.68 (0.50-0.93) |
| TZD       | TZD    | 27,345 | 1.09 (0.82-1.86) | 41,892 | 409 | 9.8 (8.9-10.8)  | 1.00 (reference) | 1.00 (reference) |

Abbreviations: Yr, year; IQR, interquartile range; HR, hazard ratio; PS, propensity score; CI, confidence interval; DPP, DPP-4 inhibitor; SU, Sulfonylurea; TZD, Thiazolidinedione; GLP, GLP-1 receptor agonist; LAI, long acting insulin.

\*Analysis based on as treated exposure definition.

†Latency period is defined as the period allowing for retinopathy events to occur after censoring for treatment changes.

‡Propensity score weighted HR were standardized to the distribution of baseline covariates in incretin-based therapy initiators.

SUPPLEMENTARY DATA

**Supplementary Table 10. Crude and adjusted hazard ratios for advanced diabetic retinopathy associated with use of incretin-based therapies compared with therapeutic alternatives based on initial treatment analysis\*.**

| Comparison    | Cohort | No. of Patient | Median duration (yr) of treatment (IQR) | Person-yr | No. of advanced diabetic retinopathy requiring treatment events | Advanced diabetic retinopathy rate per 1,000 patient-yr | Crude HR (95% CI) | PS weighting† HR (95% CI) |
|---------------|--------|----------------|-----------------------------------------|-----------|-----------------------------------------------------------------|---------------------------------------------------------|-------------------|---------------------------|
| DPP4i vs SU   | DPP4i  | 39,292         | 2.24 (0.94-3.00)                        | 76,664    | 532                                                             | 6.9 (6.4-7.6)                                           | 1.08 (0.97-1.20)  | 0.89 (0.80-1.00)          |
|               | SU     | 87,073         | 2.48 (1.05-3.00)                        | 177,577   | 1,131                                                           | 6.4 (6.0-6.8)                                           | 1.00 (reference)  | 1.00 (reference)          |
| DPP4i vs TZD  | DPP4i  | 51,410         | 2.17 (0.94-3.00)                        | 99,372    | 788                                                             | 7.9 (7.4-8.5)                                           | 0.87 (0.77-0.97)  | 0.89 (0.77-1.04)          |
|               | TZD    | 22,231         | 3.00 (1.57-3.00)                        | 51,432    | 454                                                             | 8.8 (8.0-9.7)                                           | 1.00 (reference)  | 1.00 (reference)          |
| GLP1RA vs LAI | GLP1RA | 9,561          | 2.13 (0.89-3.00)                        | 18,217    | 128                                                             | 7.0 (5.9-8.4)                                           | 0.53 (0.44-0.64)  | 0.55 (0.45-0.66)          |
|               | LAI    | 82,849         | 1.95 (0.73-3.00)                        | 151,157   | 2,006                                                           | 13.3 (12.7-13.9)                                        | 1.00 (reference)  | 1.00 (reference)          |
| GLP1RA vs TZD | GLP1RA | 10,355         | 1.68 (0.66-3.00)                        | 17,626    | 200                                                             | 11.3 (9.9-13.0)                                         | 1.18 (1.00-1.38)  | 0.75 (0.58-0.98)          |
|               | TZD    | 27,345         | 3.00 (1.39-3.00)                        | 61,317    | 563                                                             | 9.2 (8.4-10.0)                                          | 1.00 (reference)  | 1.00 (reference)          |

Abbreviations: Yr, year; IQR, interquartile range; HR, hazard ratio; PS, propensity score; CI, confidence interval; DPP4i, dipeptidyl peptidase-4 inhibitors; SU, Sulfonylurea; TZD, Thiazolidinedione; GLP1RA, Glucagon-like peptide-1 receptor agonist; LAI, long acting insulin.

\*Initial treatment analysis is defined as completely ignoring treatment changes during follow-up (this mimics the intention-to-treat analysis in a randomized trial and is equivalent to an indefinite latent period). The follow-up ends with the earliest of the following events: 3 years after initiation, death, end of enrolment for Medicare Parts A, B, end of study (Sep 30, 2015), or a claim for retinopathy treatment. Patients initiated the therapy on the day of outcome occurrence, death, end of Medicare part A,B, end of study (9/30/2015) were excluded when estimating HR.

†Propensity score weighted HR were standardized to the distribution of baseline covariates in incretin-based therapy initiators.

SUPPLEMENTARY DATA

**Supplementary Table 11. Crude and adjusted hazard ratios for advanced diabetic retinopathy treatment associated with use of incretin-based therapies compared with therapeutic alternatives based on modified primary outcome\*†.**

| Comparison    | Cohort | No. of Patient | Median duration (yr) of treatment (IQR) | Person-yr | No. of advanced diabetic retinopathy requiring treatment events | Advanced diabetic retinopathy ate per 1,000 patient-yr | Crude HR (95% CI) | PS weighting‡ HR (95% CI) |
|---------------|--------|----------------|-----------------------------------------|-----------|-----------------------------------------------------------------|--------------------------------------------------------|-------------------|---------------------------|
| DPP4i vs SU   | DPP4i  | 39,292         | 0.75 (0.41-1.68)                        | 50,241    | 330                                                             | 6.6 (5.9-7.3)                                          | 1.11 (0.98-1.27)  | 0.92 (0.80-1.06)          |
|               | SU     | 87,073         | 0.87 (0.42-2.01)                        | 129,173   | 719                                                             | 5.6 (5.2-6.0)                                          | 1.00 (reference)  | 1.00 (reference)          |
| DPP4i vs TZD  | DPP4i  | 51,410         | 0.80 (0.41-1.70)                        | 67,368    | 479                                                             | 7.1 (6.5-7.8)                                          | 0.81 (0.69-0.94)  | 0.87 (0.71-1.06)          |
|               | TZD    | 22,231         | 0.74 (0.41-1.52)                        | 26,992    | 244                                                             | 9.0 (8.0-10.3)                                         | 1.00 (reference)  | 1.00 (reference)          |
| GLP1RA vs LAI | GLP1RA | 9,561          | 0.59 (0.41-1.21)                        | 9,463     | 62                                                              | 6.6 (5.1-8.4)                                          | 0.48 (0.37-0.62)  | 0.50 (0.38-0.65)          |
|               | LAI    | 82,849         | 0.67 (0.41-1.66)                        | 106,742   | 1,326                                                           | 12.4 (11.8-13.1)                                       | 1.00 (reference)  | 1.00 (reference)          |
| GLP1RA vs TZD | GLP1RA | 10,355         | 0.58 (0.41-1.17)                        | 9,900     | 117                                                             | 11.8 (9.8-14.2)                                        | 1.15 (0.93-1.42)  | 0.76 (0.53-1.07)          |
|               | TZD    | 27,345         | 0.78 (0.42-1.57)                        | 34,243    | 322                                                             | 9.4 (8.4-10.5)                                         | 1.00 (reference)  | 1.00 (reference)          |

Abbreviations: Yr, year; IQR, interquartile range; HR, hazard ratio; PS, propensity score; CI, confidence interval; DPP4i, dipeptidyl peptidase-4 inhibitors; SU, Sulfonylurea; TZD, Thiazolidinedione; GLP1RA, Glucagon-like peptide-1 receptor agonist; LAI, long acting insulin.

\*Analysis based on as treated exposure definition, latency period is 30 days.

† Outcome is defined as a diabetic retinopathy diagnosis in the primary, secondary, or third position within the same claim of the procedures including photocoagulation, intravitreal injection of anti-vascular endothelial growth factor agent or steroid, or vitrectomy.

‡ Propensity score weighted HR were standardized to the distribution of baseline covariates in incretin-based therapy initiators.

SUPPLEMENTARY DATA

**Supplementary Table 12. Crude and adjusted hazard ratios for advanced diabetic retinopathy requiring treatment associated with use of incretin-based therapies compared with therapeutic alternatives after restricting to patients who had an eye exam during follow-up\*.**

| Comparison    | Cohort | No. of Patient | Median duration (yr) of treatment (IQR) | Person-yr | No. of advanced diabetic retinopathy requiring treatment events | Advanced diabetic retinopathy requiring treatment rate per 1,000 patient-yr | Crude HR (95% CI) | PS weighting† HR (95% CI) |
|---------------|--------|----------------|-----------------------------------------|-----------|-----------------------------------------------------------------|-----------------------------------------------------------------------------|-------------------|---------------------------|
| DPP4i vs SU   | DPP4i  | 17,379         | 1.40 (0.66-2.73)                        | 32,698    | 226                                                             | 6.9 (6.1-7.9)                                                               | 1.16 (0.99-1.36)  | 0.90 (0.76-1.08)          |
|               | SU     | 40,076         | 1.66 (0.79-3.14)                        | 86,919    | 489                                                             | 5.6 (5.1-6.1)                                                               | 1.00 (reference)  | 1.00 (reference)          |
| DPP4i vs TZD  | DPP4i  | 24,174         | 1.37 (0.66-2.65)                        | 44,885    | 349                                                             | 7.8 (7.0-8.6)                                                               | 0.93 (0.76-1.16)  | 1.09 (0.83-1.42)          |
|               | TZD    | 7,149          | 1.39 (0.67-2.58)                        | 13,421    | 111                                                             | 8.3 (6.9-10.0)                                                              | 1.00 (reference)  | 1.00 (reference)          |
| GLP1RA vs LAI | GLP1RA | 3,674          | 1.04 (0.53-2.02)                        | 5,408     | 37                                                              | 6.8 (5.0-9.5)                                                               | 0.51 (0.36-0.70)  | 0.53 (0.38-0.75)          |
|               | LAI    | 36,633         | 1.46 (0.64-2.90)                        | 72,781    | 904                                                             | 12.4 (11.6-13.3)                                                            | 1.00 (reference)  | 1.00 (reference)          |
| GLP1RA vs TZD | GLP1RA | 4,433          | 0.94 (0.49-1.83)                        | 5,887     | 75                                                              | 12.7 (10.1-16.0)                                                            | 1.24 (0.95-1.63)  | 0.87 (0.57-1.35)          |
|               | TZD    | 9,735          | 1.35 (0.67-2.54)                        | 18,040    | 166                                                             | 9.2 (7.9-10.7)                                                              | 1.00 (reference)  | 1.00 (reference)          |

Abbreviations: Yr, year; IQR, interquartile range; HR, hazard ratio; PS, propensity score; CI, confidence interval; DPP4i, dipeptidyl peptidase-4 inhibitors; SU, Sulfonylurea; TZD, Thiazolidinedione; GLP1RA, Glucagon-like peptide-1 receptor agonist; LAI, long acting insulin.

\*Analysis based on as treated exposure definition, latency period is 30 days.

† Propensity score weighted HR were standardized to the distribution of baseline covariates in incretin-based therapy initiators.

SUPPLEMENTARY DATA

**Supplementary Table 13. Crude and adjusted hazard ratios for advanced diabetic retinopathy requiring treatment associated with use of incretin-based therapies compared with therapeutic alternatives after censoring patients receiving long acting insulin during follow-up\*.**

| Comparison    | Cohort | No. of Patient | Median duration (yr) of treatment (IQR) | Person-yr | No. of Advanced diabetic retinopathy requiring treatment events | Advanced diabetic retinopathy requiring treatment per 1,000 patient-yr | Crude HR (95% CI) | PS weighting† HR (95% CI) |
|---------------|--------|----------------|-----------------------------------------|-----------|-----------------------------------------------------------------|------------------------------------------------------------------------|-------------------|---------------------------|
| DPP4i vs SU   | DPP4i  | 39,292         | 0.58 (0.24-1.37)                        | 41,610    | 195                                                             | 4.7 (4.1-5.4)                                                          | 0.94 (0.79-1.10)  | 0.83 (0.70-0.99)          |
|               | SU     | 87,073         | 0.69 (0.41-1.75)                        | 113,858   | 532                                                             | 4.7 (4.3-5.1)                                                          | 1.00 (reference)  | 1.00 (reference)          |
| DPP4i vs TZD  | DPP4i  | 51,410         | 0.59 (0.34-1.40)                        | 56,300    | 358                                                             | 6.4 (5.7-7.1)                                                          | 0.84 (0.70-1.00)  | 0.94 (0.74-1.19)          |
|               | TZD    | 22,231         | 0.58 (0.41-1.32)                        | 23,314    | 181                                                             | 7.8 (6.7-9.0)                                                          | 1.00 (reference)  | 1.00 (reference)          |
| GLP1RA vs TZD | GLP1RA | 10,355         | 0.41 (0.11-0.73)                        | 6,461     | 59                                                              | 9.1 (7.1-11.8)                                                         | 0.95 (0.72-1.26)  | 0.88 (0.58-1.31)          |
|               | TZD    | 27,345         | 0.61 (0.41-1.36)                        | 29,566    | 246                                                             | 8.3 (7.3-9.4)                                                          | 1.00 (reference)  | 1.00 (reference)          |

Abbreviations: Yr, year; IQR, interquartile range; HR, hazard ratio; PS, propensity score; CI, confidence interval; DPP4i, dipeptidyl peptidase-4 inhibitors; SU, Sulfonylurea; TZD, Thiazolidinedione; GLP1RA, Glucagon-like peptide-1 receptor agonist; LAI, long acting insulin.

\*Analysis based on as treated exposure definition, latency period is 30 days.

† Propensity score weighted HR were standardized to the distribution of baseline covariates in incretin-based therapy initiators.

SUPPLEMENTARY DATA

**Supplementary Table 14. Crude and adjusted hazard ratios for advanced diabetic retinopathy requiring treatment associated with use of incretin-based therapies compared with therapeutic alternatives after censoring patients receiving medications that may induce or worsen diabetic retinopathy, or slow the progression of retinopathy (fenofibrate)\*†.**

| Comparison    | Cohort | No. of Patient | Median duration (yr) of treatment (IQR) | Person-yr | No. of Advanced diabetic retinopathy requiring treatment events | Advanced diabetic retinopathy requiring treatment rate per 1,000 patient-yr | Crude HR (95% CI) | PS weighting‡ HR (95% CI) |
|---------------|--------|----------------|-----------------------------------------|-----------|-----------------------------------------------------------------|-----------------------------------------------------------------------------|-------------------|---------------------------|
| DPP4i vs SU   | DPP4i  | 39,292         | 0.50 (0.19-1.18)                        | 37,001    | 280                                                             | 7.6 (6.7-8.5)                                                               | 1.07 (0.92-1.23)  | 0.88 (0.75-1.02)          |
|               | SU     | 87,073         | 0.58 (0.23-1.42)                        | 95,651    | 641                                                             | 6.7 (6.2-7.2)                                                               | 1.00 (reference)  | 1.00 (reference)          |
| DPP4i vs TZD  | DPP4i  | 51,410         | 0.58 (0.25-1.27)                        | 51,403    | 433                                                             | 8.4 (7.7-9.3)                                                               | 0.83 (0.71-0.98)  | 0.91 (0.74-1.13)          |
|               | TZD    | 22,231         | 0.58 (0.31-1.19)                        | 21,230    | 220                                                             | 10.4 (9.1-11.8)                                                             | 1.00 (reference)  | 1.00 (reference)          |
| GLP1RA vs LAI | GLP1RA | 9,561          | 0.41 (0.18-0.91)                        | 7,203     | 63                                                              | 8.7 (6.8-11.2)                                                              | 0.55 (0.43-0.71)  | 0.57 (0.44-0.74)          |
|               | LAI    | 82,849         | 0.45 (0.16-1.10)                        | 77,184    | 1,118                                                           | 14.5 (13.7-15.4)                                                            | 1.00 (reference)  | 1.00 (reference)          |
| GLP1RA vs TZD | GLP1RA | 10,355         | 0.43 (0.20-0.88)                        | 7,609     | 108                                                             | 14.2 (11.7-17.2)                                                            | 1.23 (0.99-1.53)  | 0.92 (0.65-1.30)          |
|               | TZD    | 27,345         | 0.58 (0.34-1.23)                        | 26,835    | 282                                                             | 10.5 (9.3-11.8)                                                             | 1.00 (reference)  | 1.00 (reference)          |

Abbreviations: Yr, year; IQR, interquartile range; HR, hazard ratio; PS, propensity score; CI, confidence interval; DPP4i, dipeptidyl peptidase-4 inhibitors; SU, Sulfonylurea; TZD, Thiazolidinedione; GLP1RA, Glucagon-like peptide-1 receptor agonist; LAI, long acting insulin.

\*Analysis based on as treated exposure definition, latency period is 30 days.

† Drugs may induce diabetic retinopathy or macular edema include tamoxifen, quinine, chloroquine, hydroxychloroquine, mefloquine, digoxin, ethambutol, peginterferonalfa 2a, peginterferonalfa 2b, interferon alfa-2b, interferon alfa n3, interferon alfacon 1, interferon beta 1a, interferon alfa 1b, isocarboxazid, sildenafil, isotretinoin, vigabatrin, fingolimod, doxetaxel, niacin, and latanoprost (ophthalmic).

‡Propensity score weighted HR were standardized to the distribution of baseline covariates in incretin-based therapy initiators.



SUPPLEMENTARY DATA

**Supplementary Table 15. Crude and adjusted hazard ratios for advanced diabetic retinopathy associated with use of IBTs compared with therapeutic alternatives based multivariate Cox regression model\*.**

| Comparison    | Cohort | No. of Patient | Median duration (yr) of treatment (IQR) | Person-yr | No. of Advanced diabetic retinopathy requiring treatment events | Advanced diabetic retinopathy rate per 1,000 patient-yr | Crude HR (95% CI) | Adjusted† HR (95% CI) |
|---------------|--------|----------------|-----------------------------------------|-----------|-----------------------------------------------------------------|---------------------------------------------------------|-------------------|-----------------------|
| DPP4i vs SU   | DPP4i  | 39,292         | 0.75 (0.41-1.67)                        | 50,222    | 349                                                             | 6.9 (6.3-7.7)                                           | 1.10 (0.97-1.25)  | 0.96 (0.84-1.10)      |
|               | SU     | 87,073         | 0.87 (0.42-2.01)                        | 129,099   | 772                                                             | 6.0 (5.6-6.4)                                           | 1.00 (reference)  | 1.00 (reference)      |
| DPP4i vs TZD  | DPP4i  | 51,410         | 0.80 (0.41-1.70)                        | 67,327    | 520                                                             | 7.7 (7.1-8.4)                                           | 0.85 (0.73-0.98)  | 0.86 (0.73-1.01)      |
|               | TZD    | 22,231         | 0.74 (0.41-1.52)                        | 26,984    | 253                                                             | 9.4 (8.3-10.6)                                          | 1.00 (reference)  | 1.00 (reference)      |
| GLP1RA vs LAI | GLP1RA | 9,561          | 0.59 (0.41-1.21)                        | 9,462     | 66                                                              | 7.0 (5.5-8.9)                                           | 0.49 (0.39-0.63)  | 0.51 (0.39-0.65)      |
|               | LAI    | 82,849         | 0.67 (0.41-1.66)                        | 106,699   | 1,368                                                           | 12.8 (12.2-13.5)                                        | 1.00 (reference)  | 1.00 (reference)      |
| GLP1RA vs TZD | GLP1RA | 10,355         | 0.58 (0.41-1.17)                        | 9,895     | 122                                                             | 12.3 (10.3-14.7)                                        | 1.16 (0.94-1.42)  | 0.94 (0.75-1.19)      |
|               | TZD    | 27,345         | 0.78 (0.42-1.57)                        | 34,232    | 334                                                             | 9.8 (8.8-10.9)                                          | 1.00 (reference)  | 1.00 (reference)      |

Abbreviations: Yr, year; IQR, interquartile range; HR, hazard ratio; PS, propensity score; CI, confidence interval; DPP4i, dipeptidyl peptidase-4 inhibitors; SU, Sulfonylurea; TZD, Thiazolidinedione; GLP1RA, Glucagon-like peptide-1 receptor agonist; LAI, long acting insulin.

\*Analysis based on as treated exposure definition, latency period is 30 days.

†Adjusted HRs from multivariate Cox regression model were based on original population without weighting.

SUPPLEMENTARY DATA

**Supplementary Table 16. Crude and adjusted hazard ratios for incident diabetic retinopathy associated with use of incretin-based therapy compared with therapeutic alternatives based on secondary outcome\*†.**

| Analysis†       | Comparison    | Cohort           | No. of Patient   | Median duration (yr) of treatment (IQR) | Person-yr           | No. of incident diabetic retinopathy events | Incident diabetic retinopathy rate per 1,000 patient-yr | Crude HR (95% CI) | PS weighting† HR (95% CI) |
|-----------------|---------------|------------------|------------------|-----------------------------------------|---------------------|---------------------------------------------|---------------------------------------------------------|-------------------|---------------------------|
| 0-day latency§  | DPP4i vs SU   | DPP4i            | 34,737           | 0.63 (0.33-1.49)                        | 39,578              | 2,349                                       | 59.4 (56.9-61.9)                                        | 1.14 (1.08-1.19)  | 0.97 (0.92-1.02)          |
|                 |               | SU               | 78,916           | 0.74 (0.33-1.82)                        | 105,961             | 5,284                                       | 49.9 (48.5-51.3)                                        | 1.00 (reference)  | 1.00 (reference)          |
|                 | DPP4i vs TZD  | DPP4i            | 45,316           | 0.66 (0.33-1.50)                        | 52,753              | 3,331                                       | 63.1 (61.0-65.4)                                        | 0.92 (0.87-0.98)  | 0.95 (0.87-1.03)          |
|                 |               | TZD              | 19,520           | 0.59 (0.33-1.32)                        | 20,689              | 1,456                                       | 70.4 (66.7-74.2)                                        | 1.00 (reference)  | 1.00 (reference)          |
|                 | GLP1RA vs LAI | GLP1RA           | 8,536            | 0.50 (0.33-1.05)                        | 7,443               | 501                                         | 67.3 (61.5-73.6)                                        | 0.61 (0.56-0.67)  | 0.62 (0.57-0.68)          |
|                 |               | LAI              | 71,112           | 0.50 (0.33-1.36)                        | 76,870              | 7,722                                       | 100.5 (98.1-102.9)                                      | 1.00 (reference)  | 1.00 (reference)          |
| GLP1RA vs TZD   | GLP1RA        | 8,973            | 0.50 (0.33-1.00) | 7,528                                   | 681                 | 90.5 (83.7-97.8)                            | 1.13 (1.03-1.23)                                        | 0.87 (0.76-0.99)  |                           |
|                 | TZD           | 23,898           | 0.63 (0.33-1.37) | 26,142                                  | 1,910               | 73.1 (69.8-76.5)                            | 1.00 (reference)                                        | 1.00 (reference)  |                           |
| 30-day latency§ | DPP4i vs SU   | DPP4i            | 34,737           | 0.67 (0.41-1.54)                        | 41,183              | 2,501                                       | 60.7 (58.3-63.2)                                        | 1.14 (1.09-1.20)  | 0.97 (0.93-1.03)          |
|                 |               | SU               | 78,917           | 0.80 (0.41-1.86)                        | 109,486             | 5,564                                       | 50.8 (49.5-52.2)                                        | 1.00 (reference)  | 1.00 (reference)          |
|                 | DPP4i vs TZD  | DPP4i            | 45,316           | 0.71 (0.41-1.55)                        | 54,745              | 3,537                                       | 64.6 (62.5-66.8)                                        | 0.92 (0.87-0.98)  | 0.96 (0.88-1.03)          |
|                 |               | TZD              | 19,520           | 0.66 (0.41-1.39)                        | 21,825              | 1,574                                       | 72.1 (68.5-75.9)                                        | 1.00 (reference)  | 1.00 (reference)          |
|                 | GLP1RA vs LAI | GLP1RA           | 8,536            | 0.58 (0.41-1.11)                        | 7,881               | 549                                         | 69.7 (63.9-75.9)                                        | 0.62 (0.57-0.68)  | 0.63 (0.58-0.69)          |
|                 |               | LAI              | 71,115           | 0.58 (0.41-1.40)                        | 79,635              | 8,165                                       | 102.5 (100.2-104.9)                                     | 1.00 (reference)  | 1.00 (reference)          |
| GLP1RA vs TZD   | GLP1RA        | 8,973            | 0.58 (0.41-1.06) | 7,939                                   | 722                 | 90.9 (84.3-98.1)                            | 1.11 (1.02-1.21)                                        | 0.85 (0.75-0.97)  |                           |
|                 | TZD           | 45,134           | 0.69 (0.41-1.43) | 52,053                                  | 3,746               | 72.0 (69.6-74.4)                            | 1.00 (reference)                                        | 1.00 (reference)  |                           |
| 60-day latency§ | DPP4i vs SU   | DPP4i            | 34,737           | 0.74 (0.50-1.58)                        | 42,734              | 2,632                                       | 61.6 (59.2-64.1)                                        | 1.14 (1.09-1.20)  | 0.97 (0.93-1.02)          |
|                 |               | SU               | 78,917           | 0.84 (0.50-1.90)                        | 112,893             | 5,802                                       | 51.4 (50.1-52.8)                                        | 1.00 (reference)  | 1.00 (reference)          |
|                 | DPP4i vs TZD  | DPP4i            | 45,316           | 0.75 (0.50-1.59)                        | 56,670              | 3,709                                       | 65.4 (63.3-67.7)                                        | 0.91 (0.86-0.97)  | 0.95 (0.88-1.03)          |
|                 |               | TZD              | 19,520           | 0.72 (0.50-1.44)                        | 22,935              | 1,687                                       | 73.6 (70.0-77.3)                                        | 1.00 (reference)  | 1.00 (reference)          |
|                 | GLP1RA vs LAI | GLP1RA           | 8,536            | 0.65 (0.46-1.16)                        | 8,304               | 595                                         | 71.7 (66.0-77.8)                                        | 0.63 (0.58-0.69)  | 0.64 (0.59-0.70)          |
|                 |               | LAI              | 71,115           | 0.66 (0.46-1.43)                        | 82,274              | 8,527                                       | 103.6 (101.3-106.0)                                     | 1.00 (reference)  | 1.00 (reference)          |
| GLP1RA vs TZD   | GLP1RA        | 8,973            | 0.64 (0.48-1.11) | 8,330                                   | 771                 | 92.6 (86.0-99.6)                            | 1.12 (1.03-1.21)                                        | 0.86 (0.76-0.97)  |                           |
|                 | TZD           | 23,898           | 0.74 (0.50-1.48) | 28,741                                  | 2,174               | 75.6 (72.4-79.0)                            | 1.00 (reference)                                        | 1.00 (reference)  |                           |
| 90-day latency§ | DPP4i vs SU   | DPP4i            | 34,737           | 0.79 (0.56-1.63)                        | 44,228              | 2,734                                       | 61.8 (59.5-64.2)                                        | 1.14 (1.09-1.19)  | 0.97 (0.92-1.02)          |
|                 |               | SU               | 78,917           | 0.90 (0.58-1.94)                        | 116,188             | 6,010                                       | 51.7 (50.4-53.1)                                        | 1.00 (reference)  | 1.00 (reference)          |
|                 | DPP4i vs TZD  | DPP4i            | 45,316           | 0.82 (0.58-1.63)                        | 58,527              | 3,860                                       | 66.0 (63.8-68.1)                                        | 0.91 (0.86-0.96)  | 0.93 (0.86-1.00)          |
|                 |               | TZD              | 19,520           | 0.77 (0.58-1.50)                        | 24,020              | 1,784                                       | 74.3 (70.8-77.9)                                        | 1.00 (reference)  | 1.00 (reference)          |
|                 | GLP1RA vs LAI | GLP1RA           | 8,536            | 0.71 (0.50-1.22)                        | 8,712               | 624                                         | 71.6 (66.1-77.6)                                        | 0.63 (0.58-0.68)  | 0.64 (0.59-0.70)          |
| LAI             | 71,115        | 0.72 (0.50-1.47) | 84,802           | 8,862                                   | 104.5 (102.2-106.8) | 1.00 (reference)                            | 1.00 (reference)                                        |                   |                           |

SUPPLEMENTARY DATA

|                     |                  |               |                  |                                      |                   |                |                                         |                                      |                                      |
|---------------------|------------------|---------------|------------------|--------------------------------------|-------------------|----------------|-----------------------------------------|--------------------------------------|--------------------------------------|
|                     | GLP1RA vs<br>TZD | GLP1RA<br>TZD | 8,973<br>23,898  | 0.68 (0.50-1.17)<br>0.82 (0.58-1.54) | 8,704<br>29,996   | 816<br>2,277   | 93.7 (87.3-100.7)<br>75.9 (72.8-79.2)   | 1.13 (1.04-1.22)<br>1.00 (reference) | 0.85 (0.75-0.96)<br>1.00 (reference) |
|                     | DPP4i vs SU      | DPP4i<br>SU   | 34,737<br>78,917 | 0.99 (0.66-1.76)<br>1.05 (0.76-2.06) | 48,429<br>125,481 | 3,020<br>6,526 | 62.4 (60.1-64.7)<br>52.0 (50.7-53.3)    | 1.15 (1.10-1.20)<br>1.00 (reference) | 0.98 (0.93-1.02)<br>1.00 (reference) |
| 180-day<br>latency§ | DPP4i vs<br>TZD  | DPP4i<br>TZD  | 45,316<br>19,520 | 0.99 (0.71-1.77)<br>0.99 (0.82-1.68) | 63,743<br>27,149  | 4,257<br>2,011 | 66.8 (64.8-68.9)<br>74.1 (70.8-77.5)    | 0.92 (0.87-0.97)<br>1.00 (reference) | 0.94 (0.88-1.01)<br>1.00 (reference) |
|                     | GLP1RA vs<br>LAI | GLP1RA<br>LAI | 8,536<br>71,115  | 0.90 (0.59-1.39)<br>0.88 (0.51-1.58) | 9,865<br>91,796   | 709<br>9,659   | 71.9 (66.7-77.5)<br>105.2 (103.0-107.5) | 0.64 (0.59-0.69)<br>1.00 (reference) | 0.65 (0.60-0.70)<br>1.00 (reference) |
|                     | GLP1RA vs<br>TZD | GLP1RA<br>TZD | 8,973<br>23,898  | 0.84 (0.52-1.32)<br>0.99 (0.82-1.72) | 9,739<br>33,598   | 909<br>2,538   | 93.3 (87.3-99.8)<br>75.5 (72.6-78.6)    | 1.13 (1.05-1.22)<br>1.00 (reference) | 0.88 (0.78-0.99)<br>1.00 (reference) |

Abbreviations: Yr, year; IQR, interquartile range; HR, hazard ratio; PS, propensity score; CI, confidence interval; DPP4i, dipeptidyl peptidase-4 inhibitors; SU, Sulfonylurea; TZD, Thiazolidinedione; GLP1RA, Glucagon-like peptide-1 receptor agonist; LAI, long acting insulin.

\*Analysis based on as treated exposure definition, latency period is 30 days.

†Our secondary outcome is incident diabetic retinopathy identified by diagnosis (ICD-9-CM 362.0X). Patients with baseline diabetic retinopathy were excluded in this analysis.

‡Propensity score weighted HR were standardized to the distribution of baseline covariates in incretin-based therapy initiators.

§Latency period is defined as the period allowing for retinopathy events to occur after censoring for treatment changes.
